# Supplementary material for: A Versatile Vector Toolkit for Functional Analysis of Rice Genes
Source: PubMed Central journal article supplement (PMC5910328; doi:10.1186/s12284-018-0220-7), 2018-04-20
Supplement: 12284_2018_220_MOESM1_ESM.pdf [file 12284_2018_220_MOESM1_ESM.pdf]

# Additional file 1

## Additional Methods

### Part 1 Plasmid vectors construction

**Construction of the first vector pRTVnRFP.** To start the construction, four DNA fragments were used to form a circle plasmid in one step ligation. These four fragments included the adjacent high copy number *E.coli* pUC replicon and kanamycin screening gene from pDBLeu vector (Yeast-Two-Hybrid system, CAT. SERIES 10835, Invitrogen), the *Nos* terminator (NosT) from pCXUN (GenBank: FJ905215.1), the tagRFP (GenBank: EF606900.1) from pYBA1157 (GenBank: KF876809.1) and the strong maize ubiquitin-1 (Ubi) promoter with intron from pCXUN, which were amplified with primer pairs P1/ P2-3, P3/ P4-3, P11/ P12 and P18/ P19-2, respectively. These fragments were digested and assembled through *Pst*I/*Asc*I, *Asc*I/*Bam*HI, *Bam*HI/*Eco*RV, and *Eco*RV/*Pst*I recognition sites. The final pRTVnRFP was obtained by substitute the NosT with 3 stop-codon-NosT PCR fragment with P3+/ P4-3 through *Not*I and *Asc*I recognition sites.

**Construction of pRTVs overexpression vectors.** To generate pRTVnHA, pRTVnMyc, pRTVnGFP and pRTVnYFP, the TagRFP tag in pRTVnRFP was substituted with HA, cMyc, GFP and mVenus, respectively. The coding DNA fragments of these tags were amplified (4× HA by P5/ P6; 4× cMyc by P7/ P8; GFP and mVenus by P9/ P10) and inserted to *Eco*RV/*Bam*HI digested pRTVnRFP vector.

A primers pair (Adaptor F/ Adaptor R) was directly used to delete TagRFP sequence in pRTVnRFP, generating tag free vector pRTV. This was achieved by primers annealing and inserting to pRTVnRFP through *Eco*RV/*Bam*HI sites. PCR products (4× HA by P5-2/ P6-2; 3× cMyc by P7-2/ P8-2; EGFP and mVenus by P9-2/ P10-2; tagRFP by P11-2/ P12-2) were digested with *Not*I and the isocaudamer *Eag*I, then inserted to *Not*I and Calf Intestinal Alkaline Phosphatase (CIP) (NEB, #M0290V) treated vector pRTV, generating C-terminal tag vectors pRTVcHA, pRTVcMyc, pRTVcGFP, pRTVcYFP, and pRTVcRFP. The correct direction of recombinants were selected by PCR and sequencing.

**Construction of BiFC vectors.** Yellow fluorescent protein mVenus was split at 155 amino acid residues and generated N-terminal mVenus (mVN<sub>1-155</sub>) and C-terminal mVenus (mVC<sub>156-238</sub>) for BiFC assay. Before constructing the N or C-terminal mVenus to the vector, another independent fluorescent protein expression element (35S-ECFP-polyA or 35S-mCherry-polyA), was inserted to pRTV. These two elements were generated by overlapping PCR method. First, PCR amplify the 35S (P34-2/ P25) from pYBA1152, ECFP and mCherry (P32/ P33) from pYBA1154 and pYBA1158, and polyA (P26/ P27-3) from pCXUN. Then, 3 PCR fragments were used as template in secondary PCR with primers P34-2/ P27-3. The large PCR products 35S-ECFP-polyA or 35S-mCherry-polyA was purified and digested with *NsiI*, followed by ligation with *PstI* and CIP treated pRTV, generating the intermediate vectors pRTV-35S-ECFP and pRTV-35S-mCherry.

Finally, the mVN<sub>1-155</sub>-HA or HA-mVN<sub>1-155</sub> was amplified (mVN<sub>1-155</sub>-HA by P9/ P13, HA-mVN<sub>1-155</sub> by P9-3/ P13-2) from pYBA1155 vector and digested with *EcoRV/ BamHI* or *NotI/ EagI*, then inserted to pRTV-35S-ECFP through *EcoRV/ BamHI* or *NotI* sites, generating N-terminal tag vector pRTVnVN and C-terminal tag vector pRTVcVN, respectively. Likewise, the mVC<sub>156-238</sub>-cMyc or cMyc-mVC<sub>156-238</sub> was amplified (mVC<sub>156-238</sub>-cMyc by P14-2/ P15, cMyc-mVC<sub>156-238</sub> by P14-3/ P10-2) and inserted to pRTV-35S-mCherry through *EcoRV/ BamHI* or *NotI* sites, generating N-terminal tag vector pRTVnVC and C-terminal tag vector pRTVcVC, respectively.

**Construction of pRHVs and pRGVs plant overexpression vectors.** The pRHVs and pRGVs plant overexpression vectors were designed for transgenic overexpression with Hygromycin and G418/ Kanamycin selection marker, respectively. To generate pRHV and pRGV, two DNA fragments were PCR amplified and inserted into pRTV in step by step manner. Step 1 was to insert the *NotI* site mutated fragment for replication in *Agrobacterium* and the T-DNA right border (i.e. pVS1 STA-REP-ori-RB) to pRTV. Two pairs of primers P20-4/ P21MR and P22MF/ P23-2 were used to amplify RB-pVS1ori-REP and pVS1STA from pCAMBIA1300 (GenBank: AF234296.1), respectively. The RB was synthesized in the primer P20-4. The two fragments were integrated by overlapping PCR, creating a point mutant *NotI* site (from GCGGCCGC to GCGTCCGC) between REP and STA, followed by

insertion to pRTV through *AscI* site and generating the intermediate vector pRTV-RBpVS1. Step 2 was to generate LB-35S-hptII-PolyA or LB-35S-nptII-PolyA through PCR and insert it to pRTV-RBpVS1. LB-35S (P24-2/ P25 for pRHV, P24-3/ P25 for pRGV, from pYBA1152; LB was synthesized in the primer P24-2 and P24-3), hptII (P28/ P29, from pCAMBIA1300), nptII (P47-2/ P48, from pCAMBIA2300, GenBank: AF234315.1) and PolyA (P26/ P27-2, from pCXUN) were amplified independently. The PCR fragments were fused by overlapping PCR method and generating LB-35S-hptII-PolyA or LB-35S-nptII-PolyA. Then, the two fusion fragments was digested with *NsiI*/ *PstI* and inserted into *PstI* and CIP treated pRTV-RBpVS1, generating the pRHV and pRGV vector, respectively.

pRHVnHA, pRHVnMyc and pRHVnGFP vectors were derived from pRHV by inserting the 4×HA, 4×cMyc and EGFP fragments from pRTVnHA, pRTVnMyc and pRTVnGFP through *EcoRV*/ *BamHI* sites, respectively. While pRHVcHA/ pRGVcHA, pRHVcMyc/ pRGVcMyc, pRHVcGFP/ pRGVcGFP and pRHVcRFP/ pRGVcRFP were constructed by amplifying the fragments 4×HA(P5-2/ P6-2), 3×/ 4×cMyc (P7-2/ P8-2), EGFP (P9-2/ P10-2) and TagRFP (P11-2/ P12-2) and inserting into pRHV and pRGV through *NotI* site, respectively.

**Construction of pRTEs, pRHEs and pRGEs vectors without the Ubi promoter.** A pair of oligos P49/ P50 was used to delete the strong Ubi promoter through *PstI*/ *EcoRV*, turning the vectors pRTV, pRTVcYFP, pRHV, pRHVcHA, pRHVcMyc, pRGV, pRGVcHA and pRGVcMyc into pRTE, pRTEcYFP, pRHE, pRHEcHA, pRHEcMyc, pRGE, pRGEcHA and pRGEcMyc, respectively. Besides, the mVenus was amplified and inserted into pRHE and pRGE, leading to pRHEcYFP and pRGEcYFP, a similar procedure as the construction of pRTVcYFP.

**Construction of CRISPR/Cas9 vectors.** The rice codon optimized Cas9 sequence was amplified with P45/ P46 from pBY02-OsCas9-ccdB. To eliminate the Cas9 toxicity to *E.coli* and *Agrobacteria*, the second intron (IV2) of potato gene *ST-LSI* was amplified and inserted into Cas9 HNH nuclease domain. The Cas9 N-terminal (P45/ P53), intron (P51-2/ P52-2) and Cas9 C-terminal (P54/ P46) were amplified separately, and then fused by overlapping PCR with the primers P45/ P46. The Cas9-intron PCR fragment was digested and inserted into pRHV or pRGV through *EcoRV*/ *NotI* sites, generating intermediate vectors pRHV-Cas9 or

pRGV-Cas9, respectively. A pair of primer with MCS linker (P55/ P56) was designed and inserted into the intermediate vectors, generating the final CRISPR/ Cas9 binary vectors pRHCas9 and pRGCas9.

Meanwhile, the single guide RNA (sgRNA) was designed assembling in two entry vectors, named pEntry A and pEntry B. The sgRNA1 expression cassette (U6p1-sgRNA scaffold) was prepared by PCR fusion the U6p1 (P39-2/ P40-3) and sgRNA (P41-3/ P44-2) from pENTR4: gRNA4. While the sgRNA2 expression cassette (U6p2-sgRNA scaffold) was amplified directly from pENTR4: gRNA4 with P39-4/ P44-2. The two cassettes were inserted into pRTE through *PstI*/ *AscI* sites, generating pEntry A and pEntry B, respectively. Thus the entry vectors and binary vectors could be used for editing single or multiple targets s in rice.

**Part 2 Construction of pRHCas9-IPA1 plasmid for genome editing.**

Step 1. Synthesis the primer pair for *IPA1* target. The complementary PAM structure containing site of *IPA1* gene 5'-ccaCCGACTCGAGCTGTGCTCTC-3' was selected for sgRNA target. Synthesize primers IPA1-sgRNA-F: 5'-tggtGAGAGCACAGCTCGAGTCGG-3' and IPA1-sgRNA-R: 5'-aaacCCGACTCGAGCTGTGCTCTC-3';

Step 2. Preparation of double strand adaptor by primers annealing. Add the components and mix well as follow:

|                       |       |
|-----------------------|-------|
| IPA1-sgRNA-F(10 μmol) | 2 μl  |
| IPA1-sgRNA-R(10 μmol) | 2 μl  |
| ddH <sub>2</sub> O    | 16 μl |
|                       |       |
| total                 | 20 μl |

Incubate in 70°C for 10 min, place on ice immediately;

Step 3. Cloning Step 2 adaptor to pEntry A vector. Digest 1μg pEntry A vector by *BsaI* (NEB, #R0535V) in 37°C for 2 h. Ligate the purified and digested pEntry A vector with the double strand adaptor in Step 2. Transform the ligation products into *E.coli* competent. Screen the recombinants with correct pEntry A-IPA1 by PCR and sequencing;

Step 4. Sub-cloning the IPA-sgRNA expression cassette to pRHCas9 vector. Digest pEntry A-IPA1 with *Pst*I/ *Spe*I, generating IPA-sgRNA expression cassette. Ligate the IPA-sgRNA expression cassette with *Pst*I/ *Spe*I digested pRHCas9. After transformation, screen the recombinants by PCR, restriction enzymes digestion and sequencing.

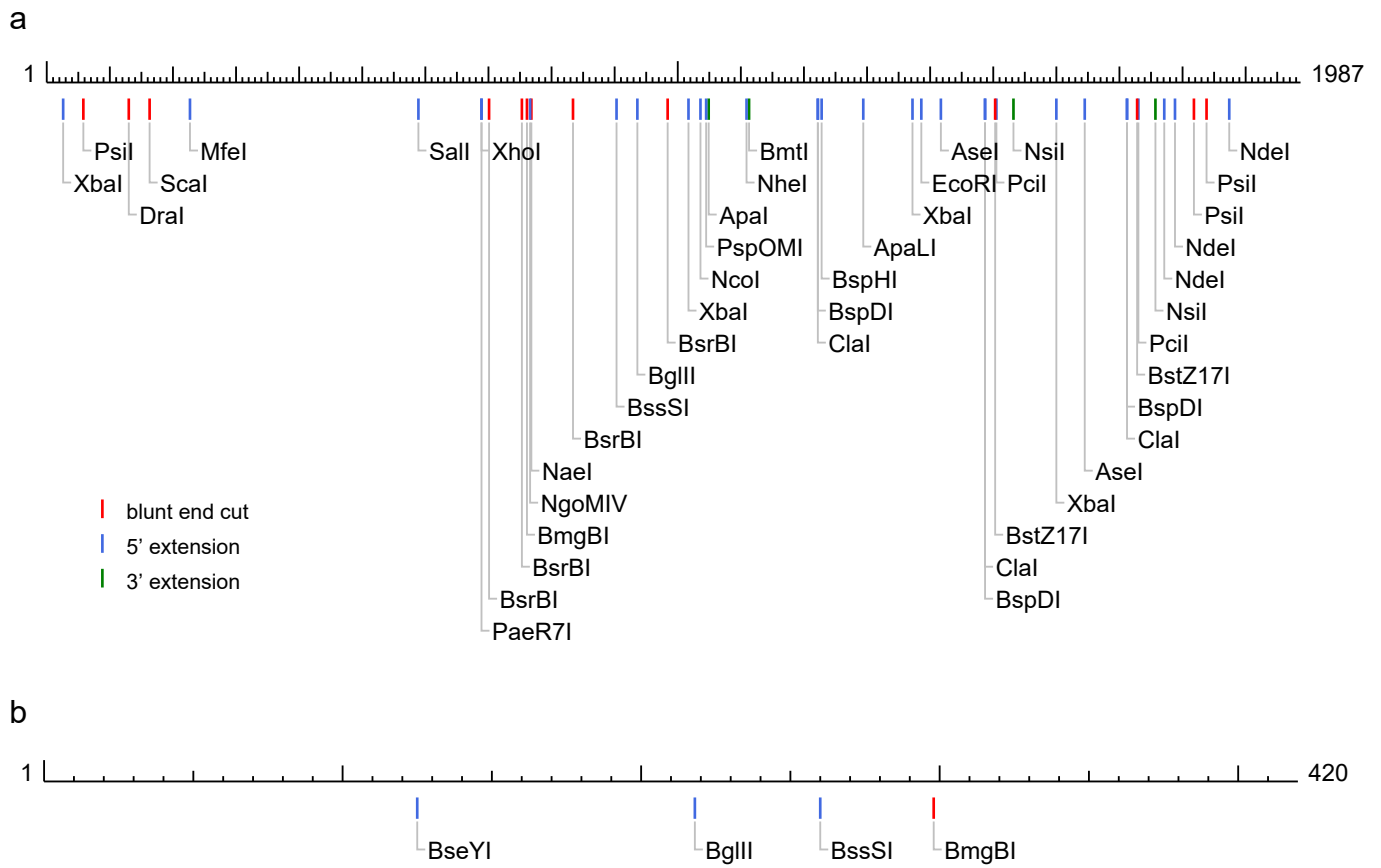

**Figure S1. Restriction maps for ubiquitin-1 and 35S promoters**

**a** Restriction enzyme sites in the ubiquitin-1 promoter. **b** Restriction enzyme sites in the 35S promoter. DNA sequences were analyzed with NEBcutter V2.0 (<http://nc2.neb.com/NEBcutter2/>). Only Type II and commercially available Type III enzymes with  $\geq 6$  bp fixed recognition sequences are indicated.

**Figure S2. Maps of all the 42 vectors**

Vector size, sequence features and restriction sites of individual vector are included.

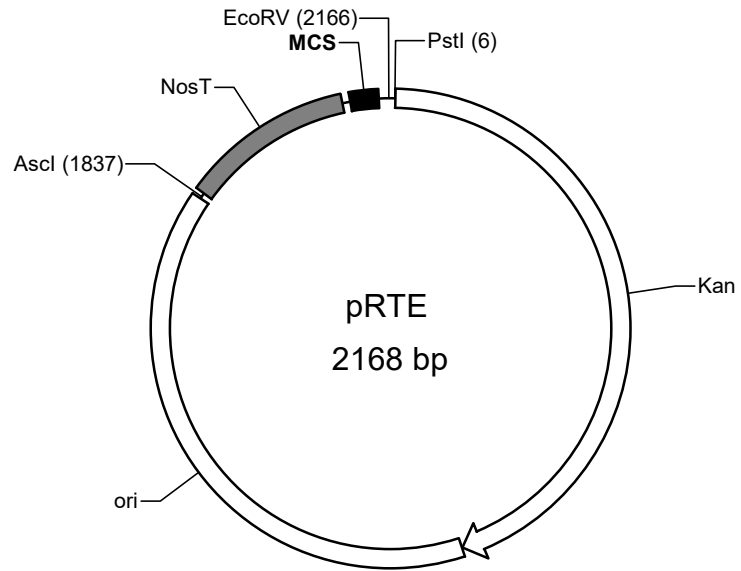



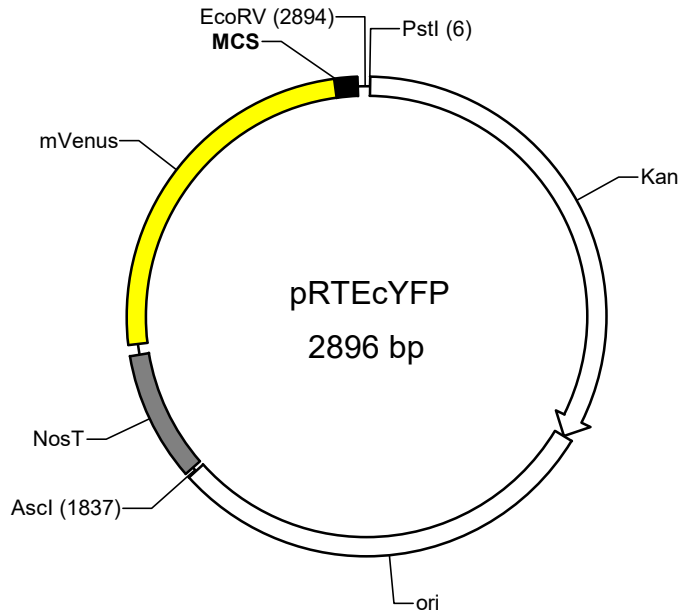

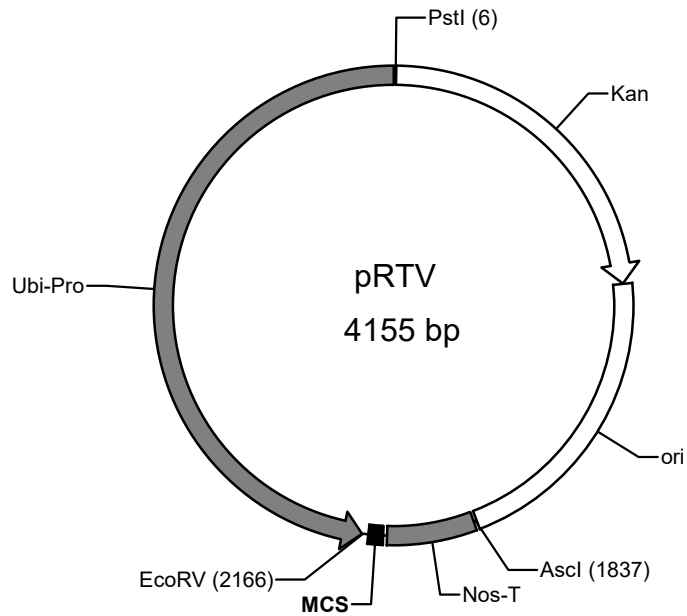

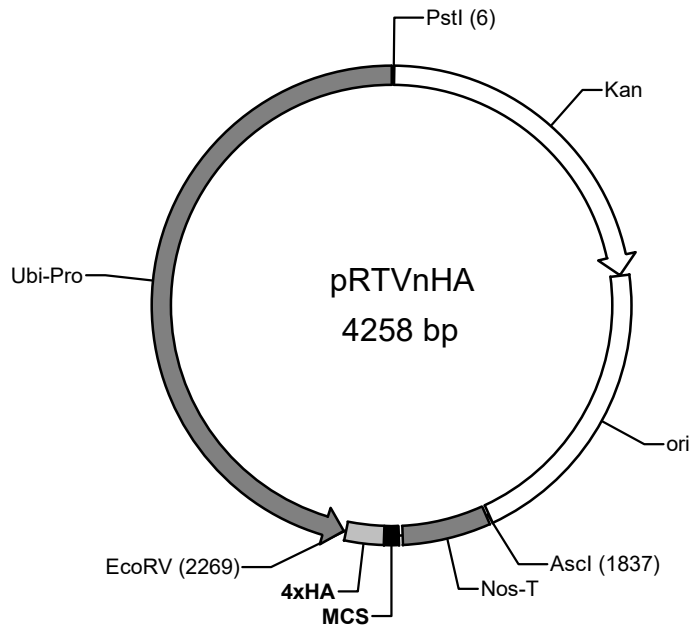

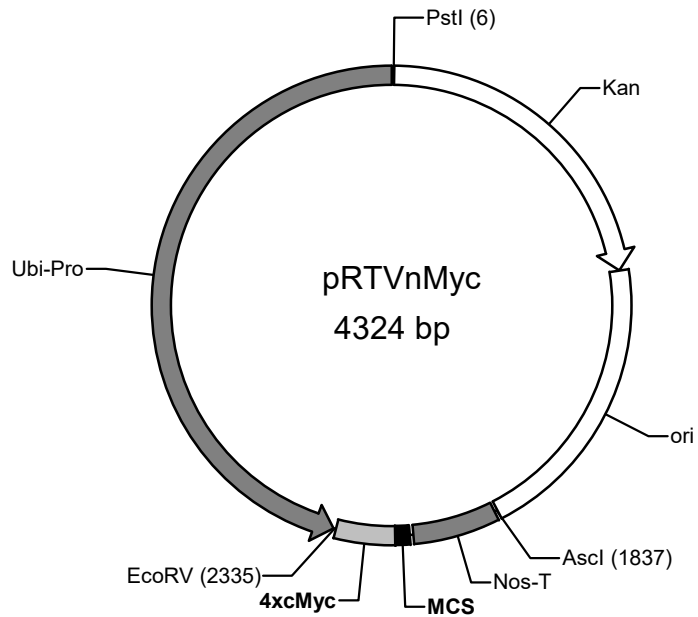

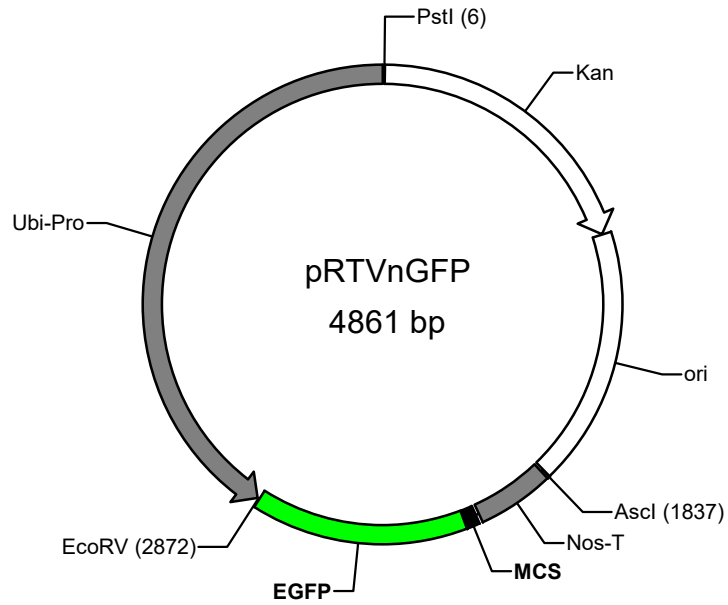

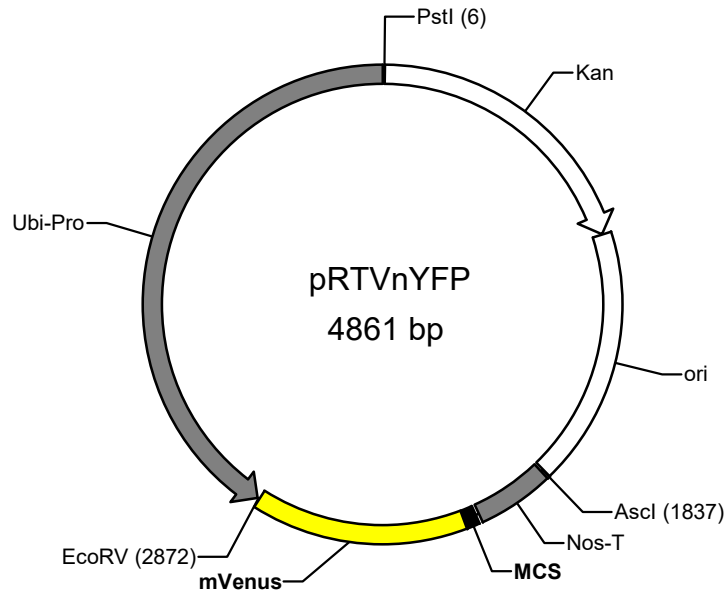

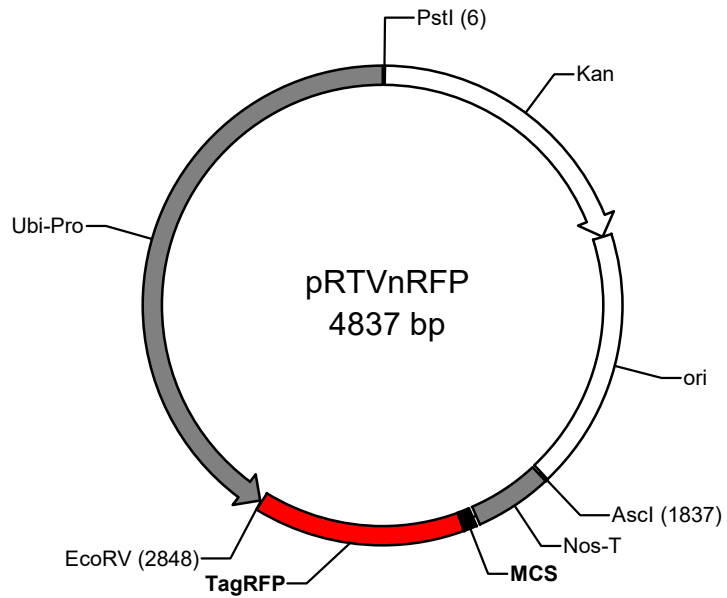

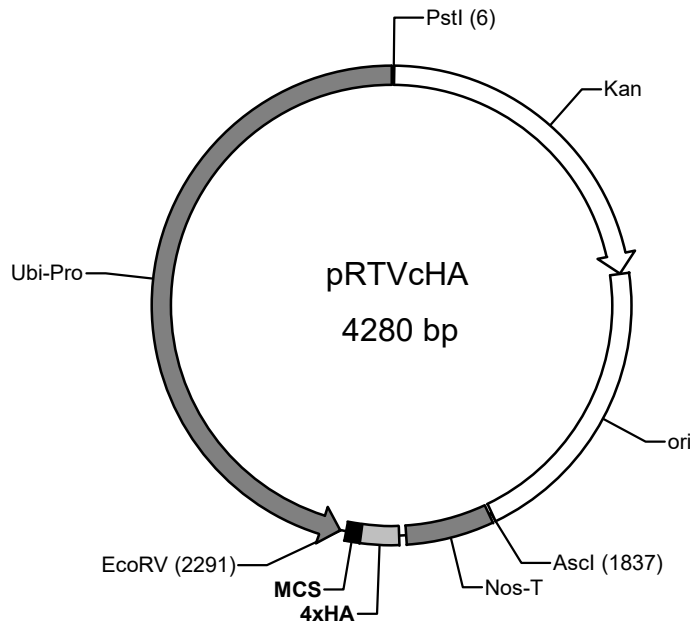



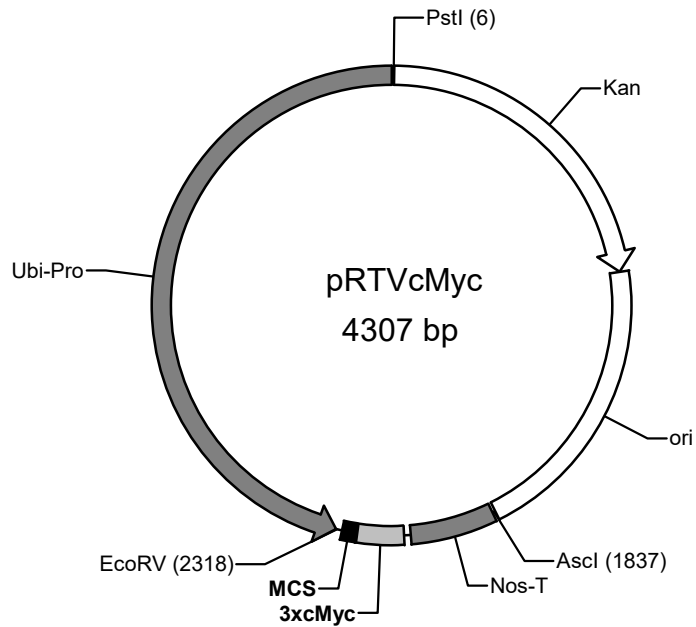

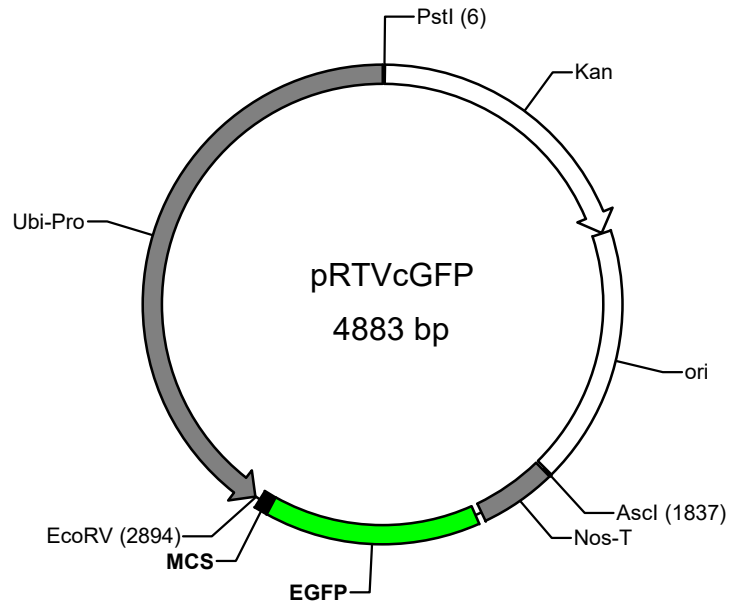

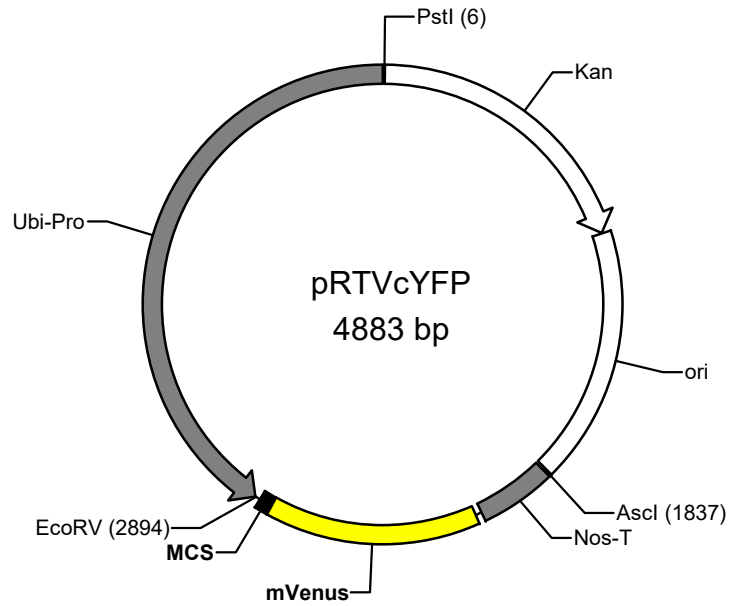

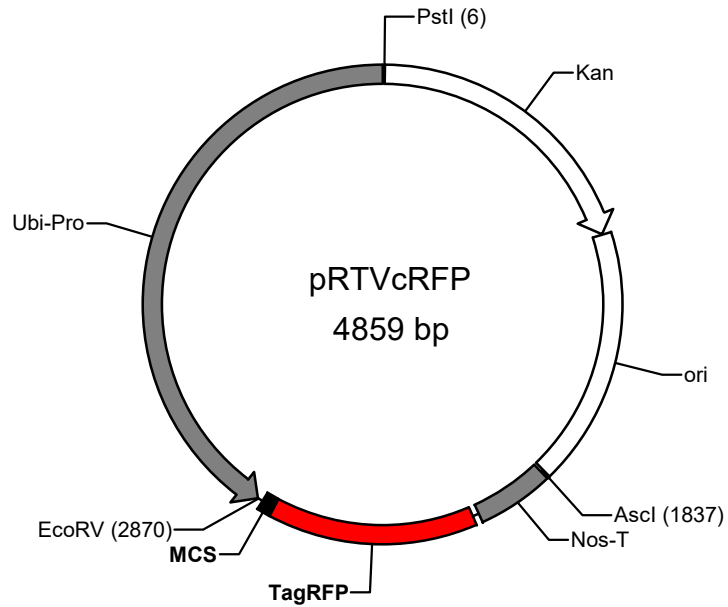

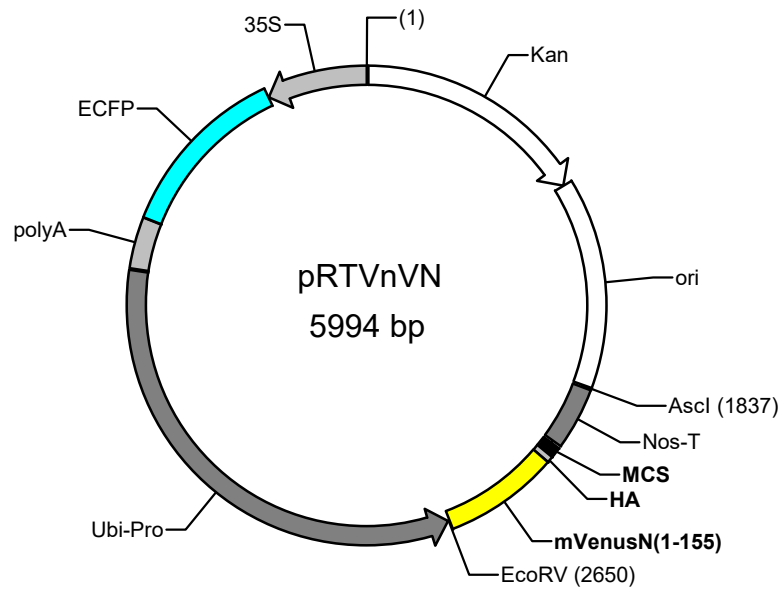

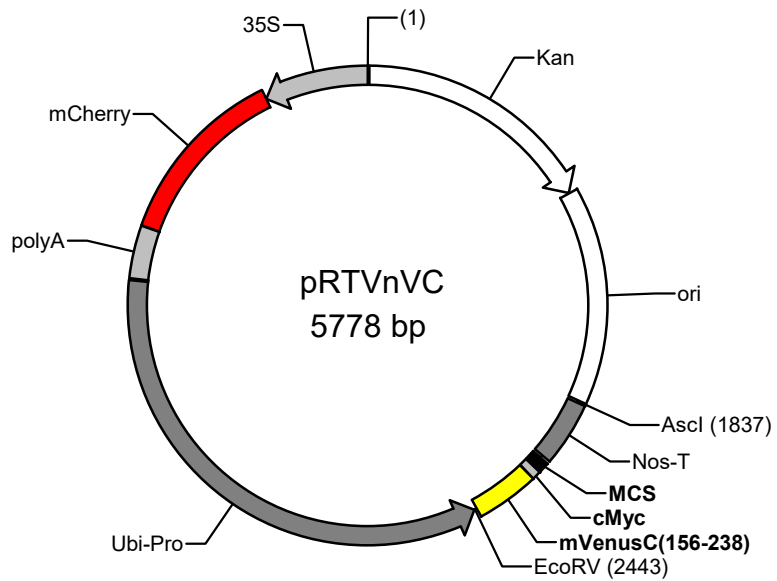

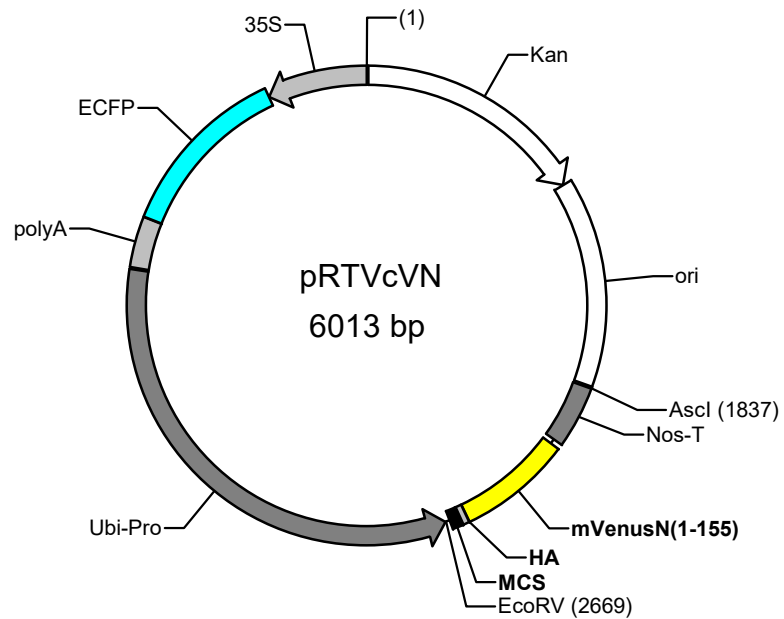

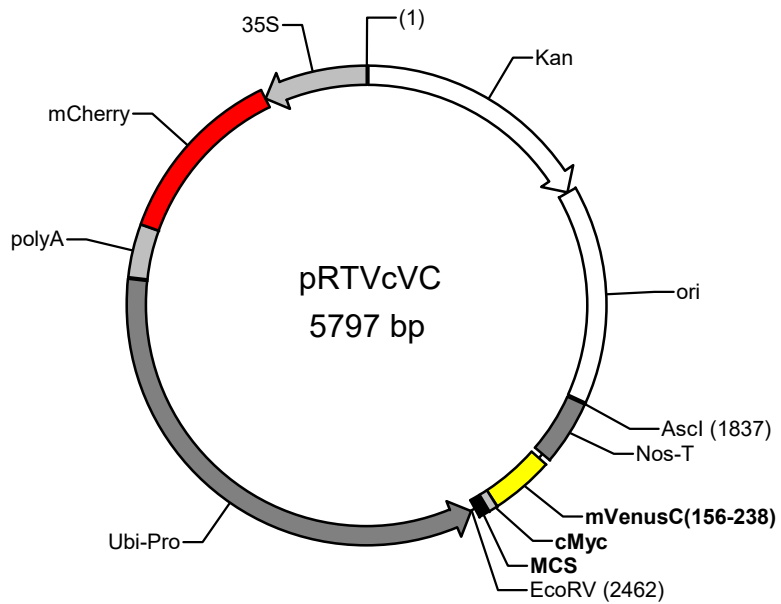



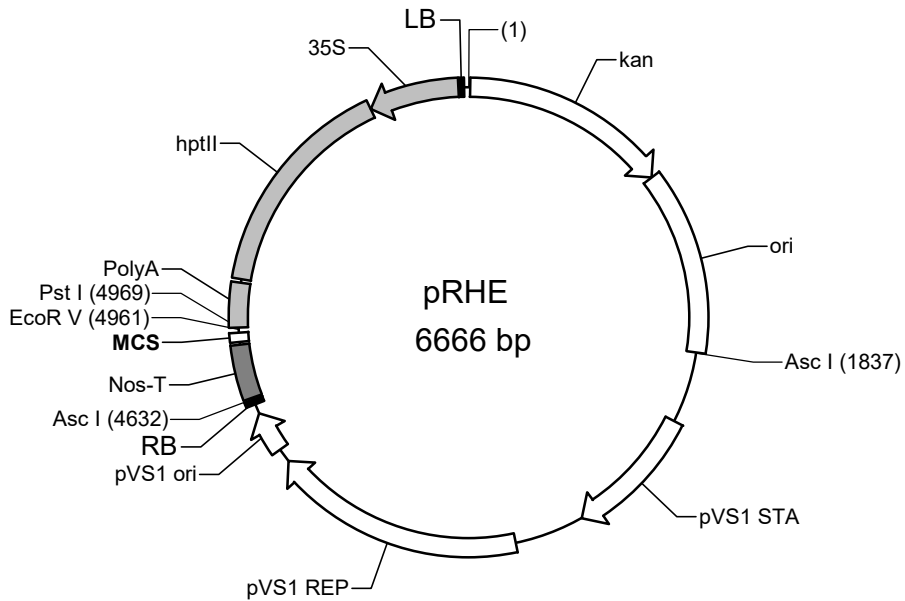

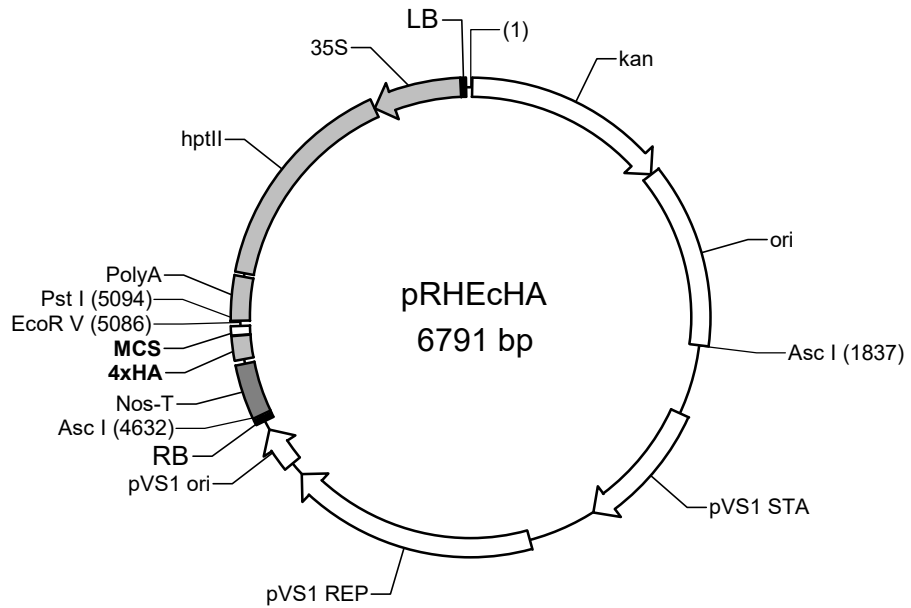

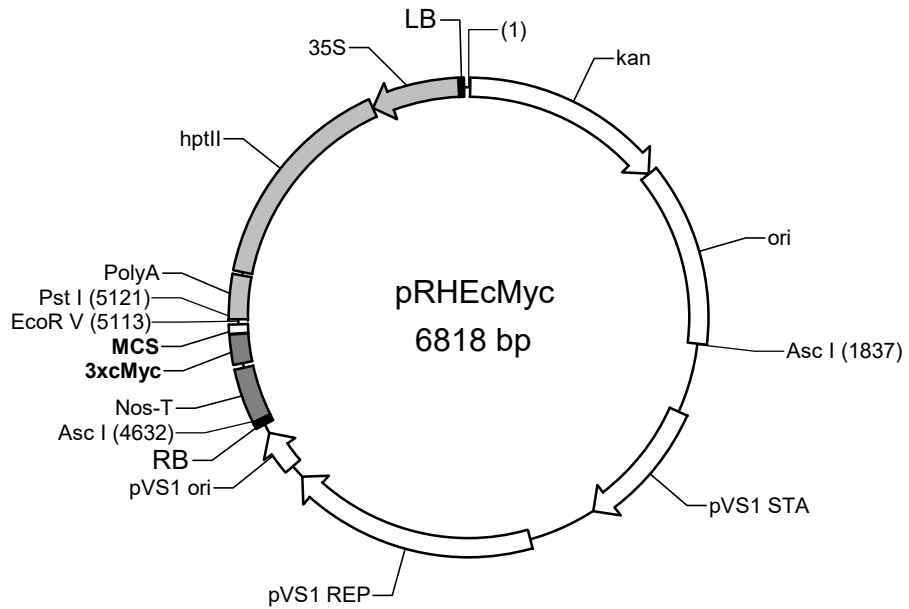

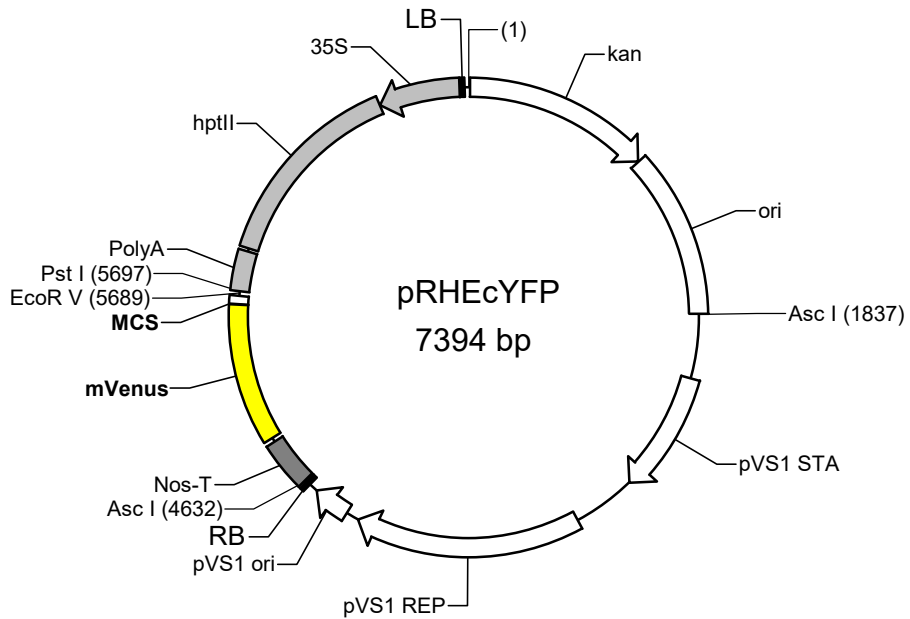

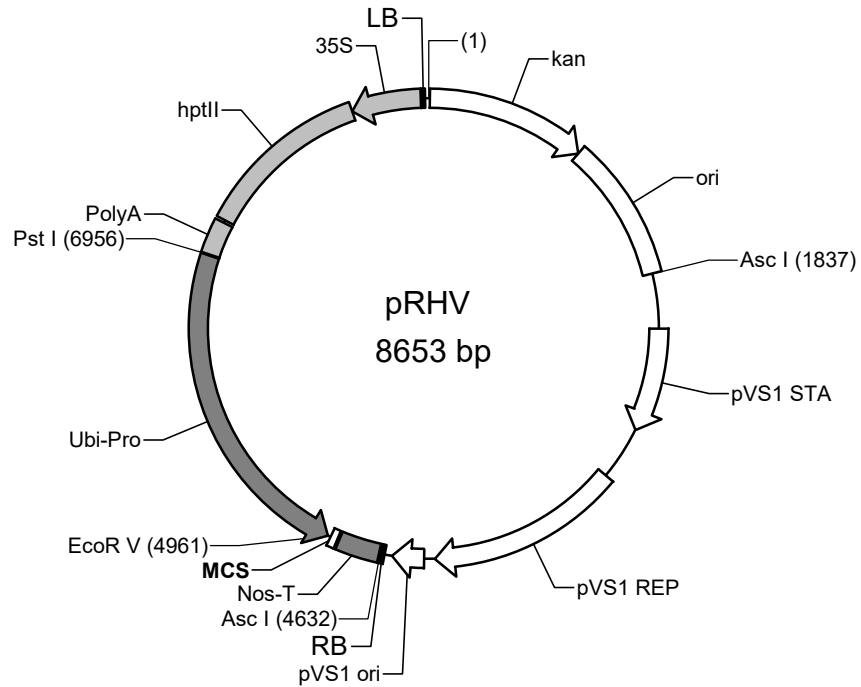

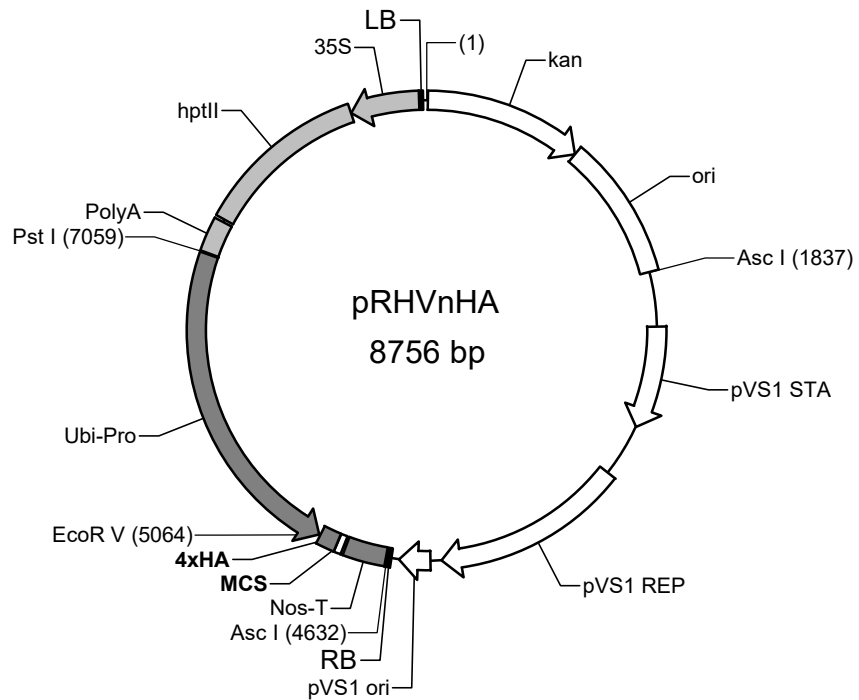

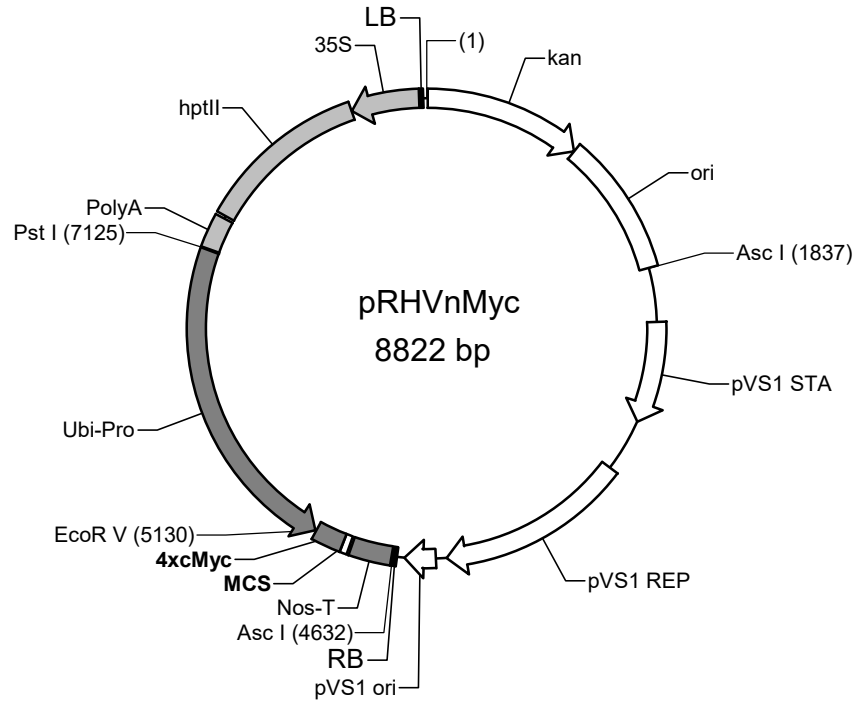

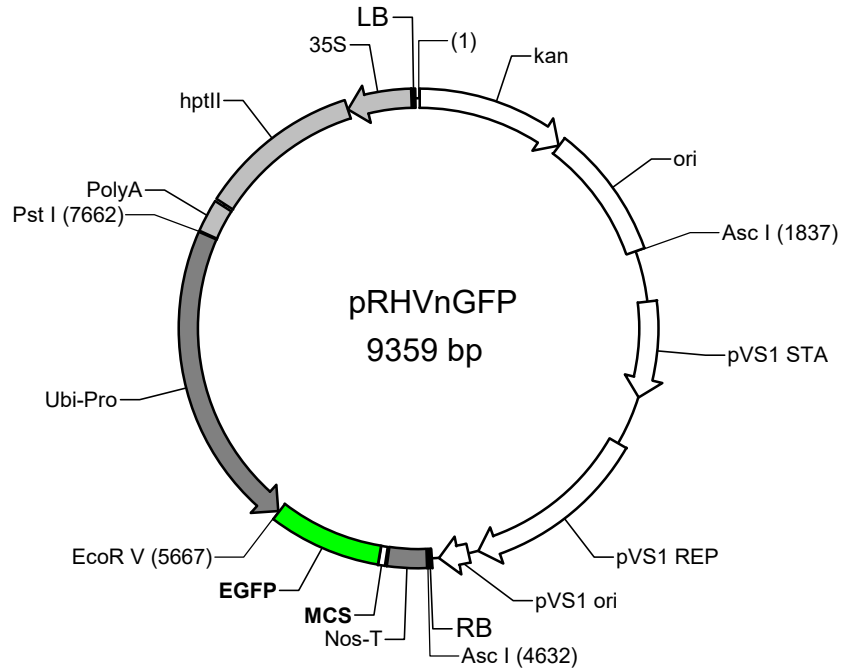



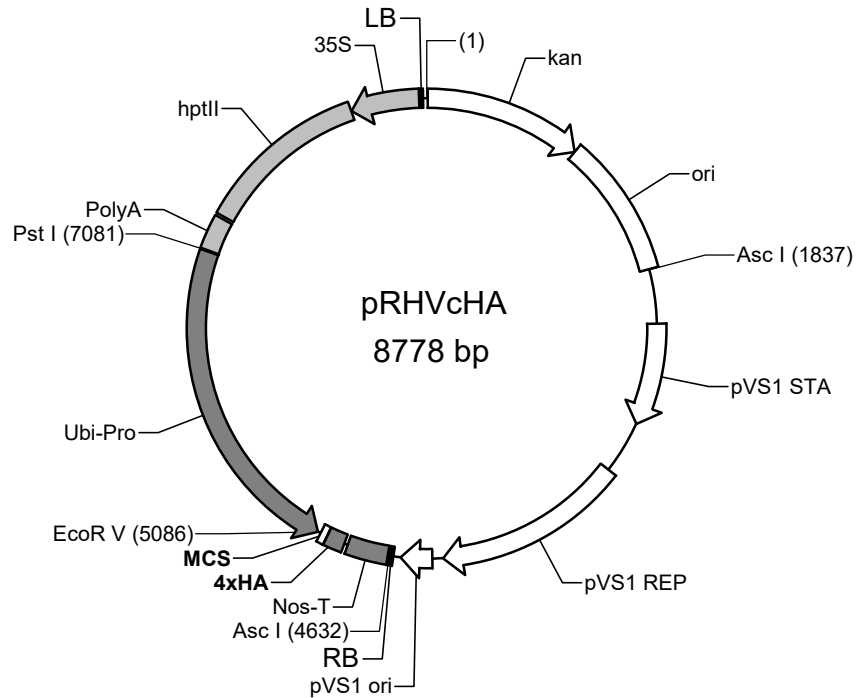

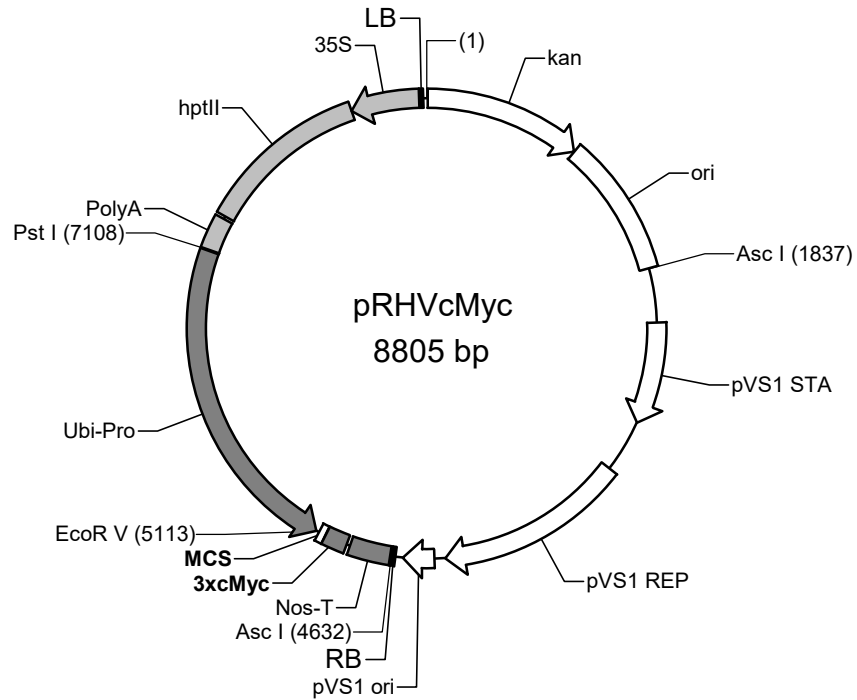

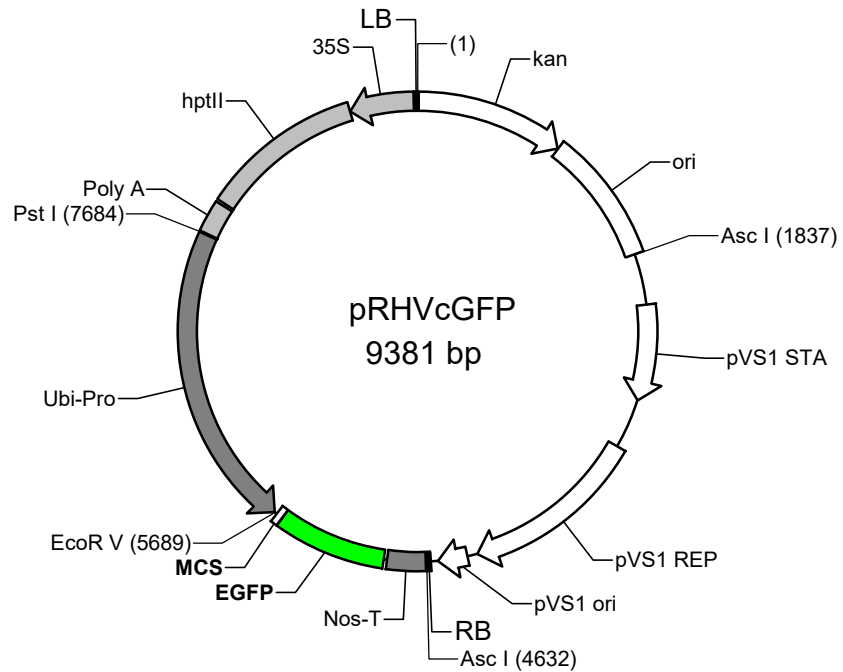

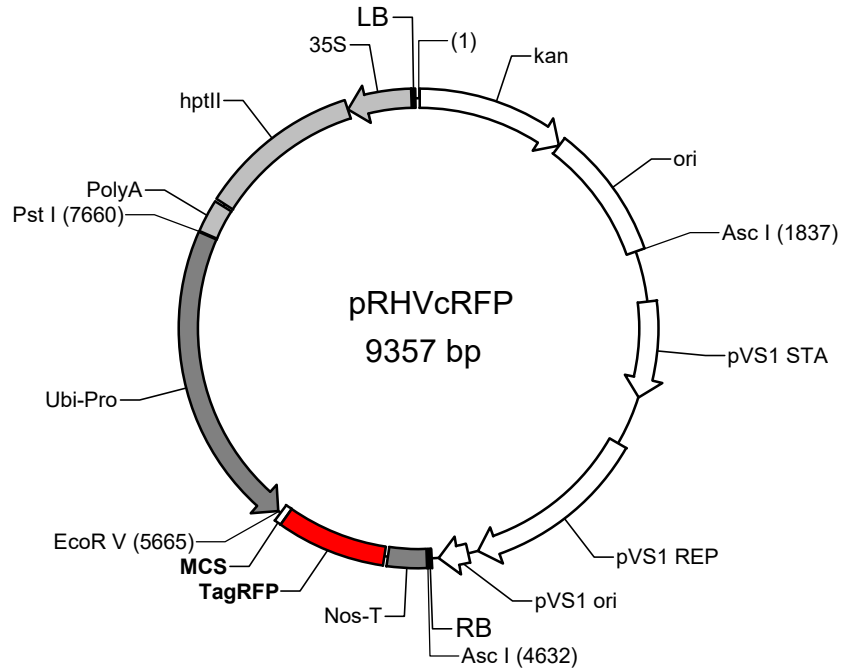

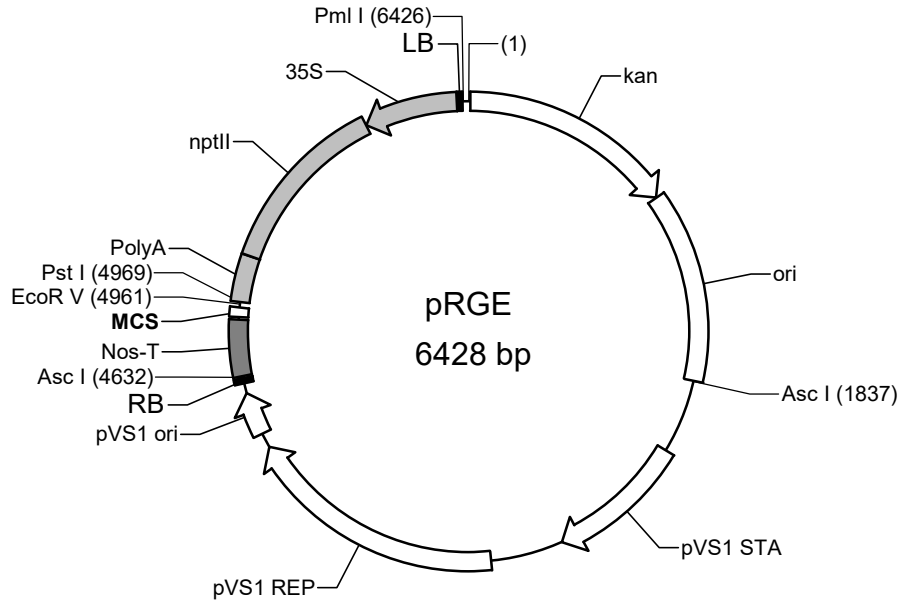

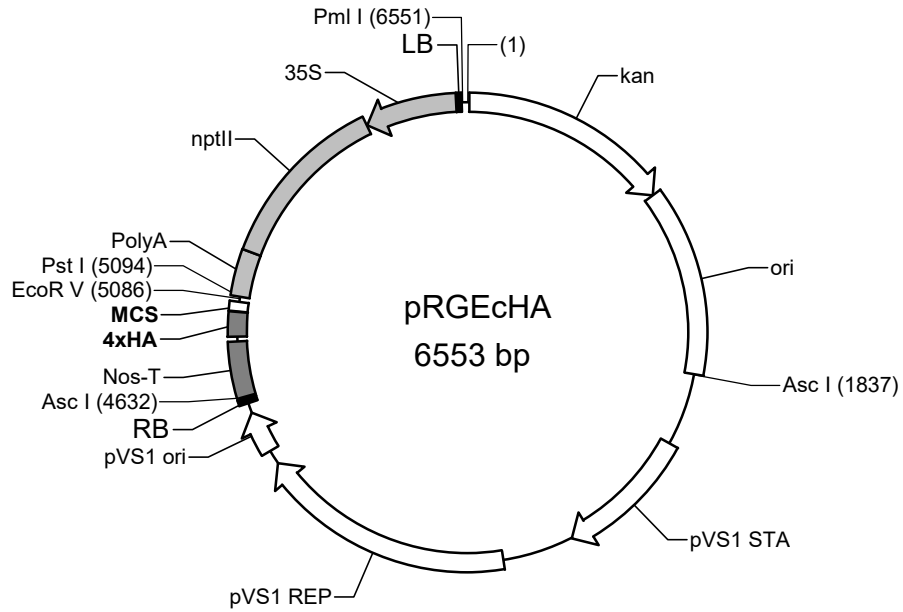

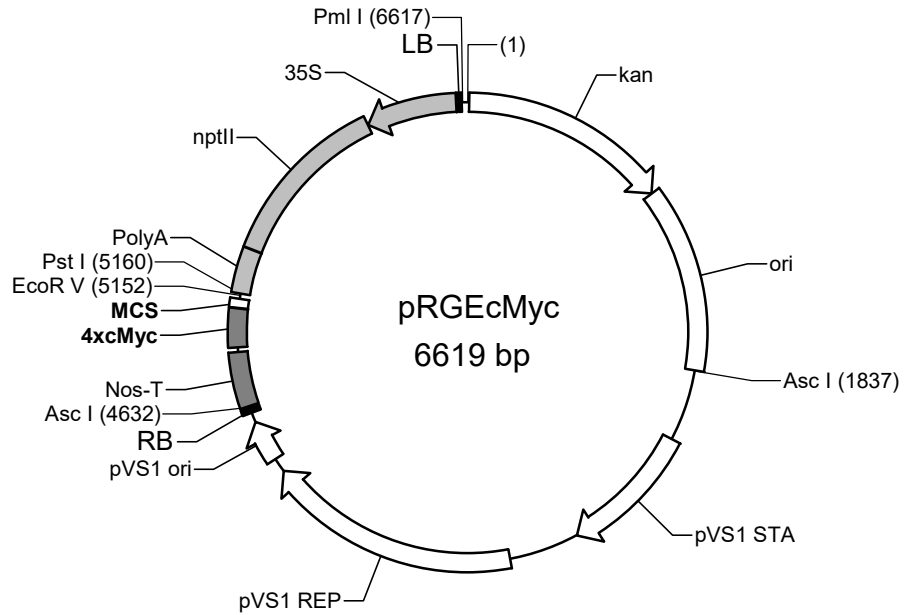

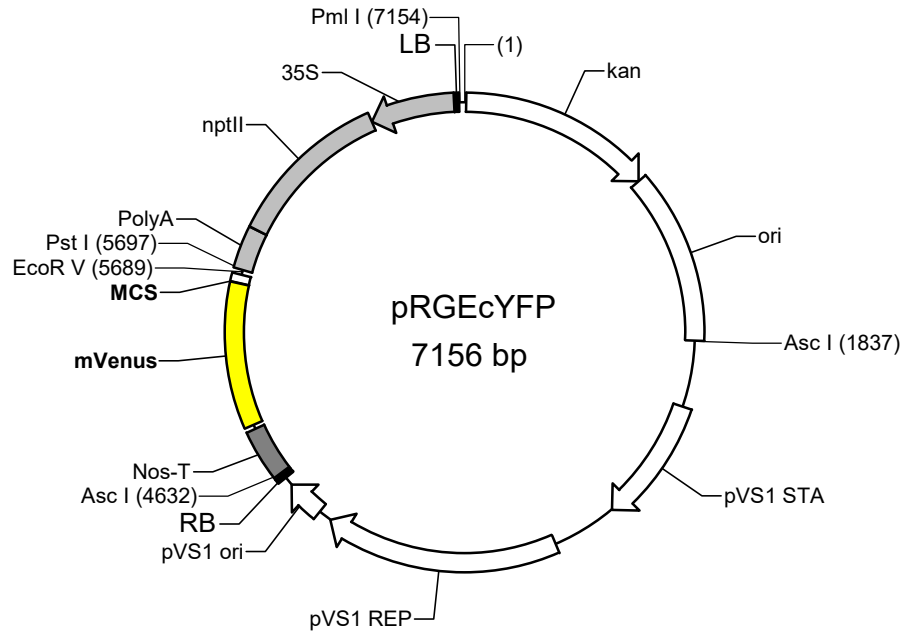



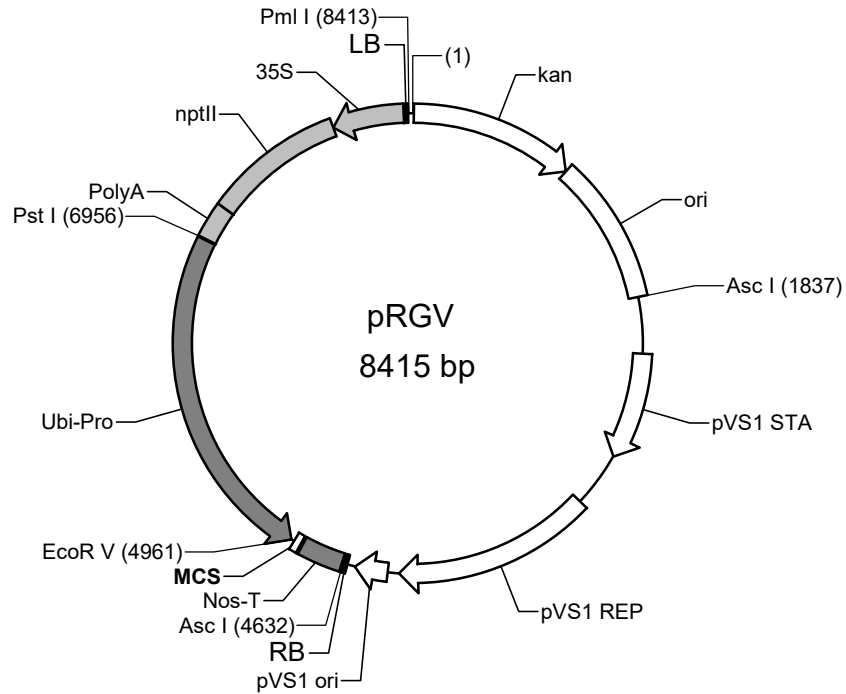

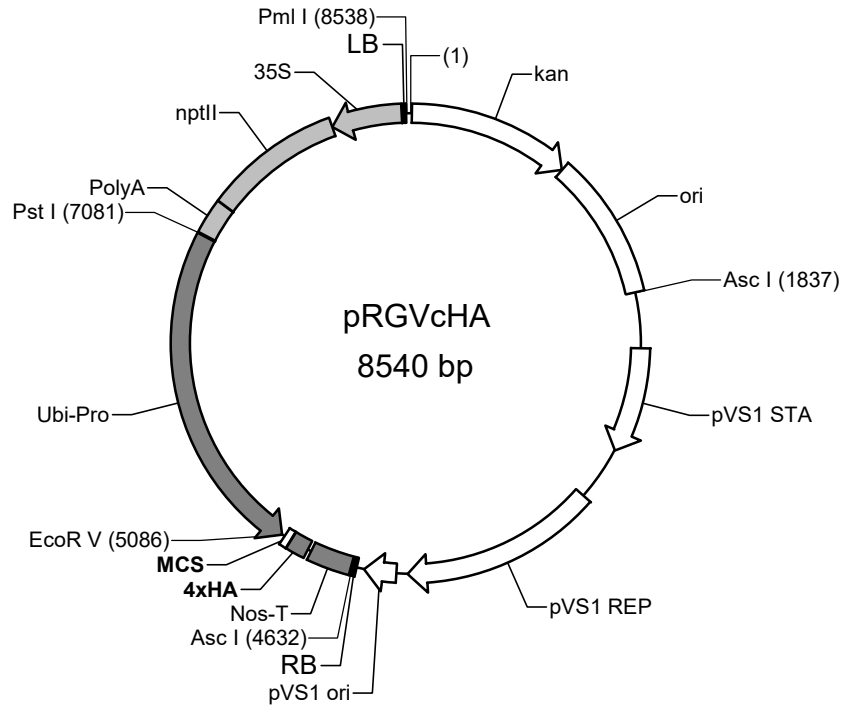

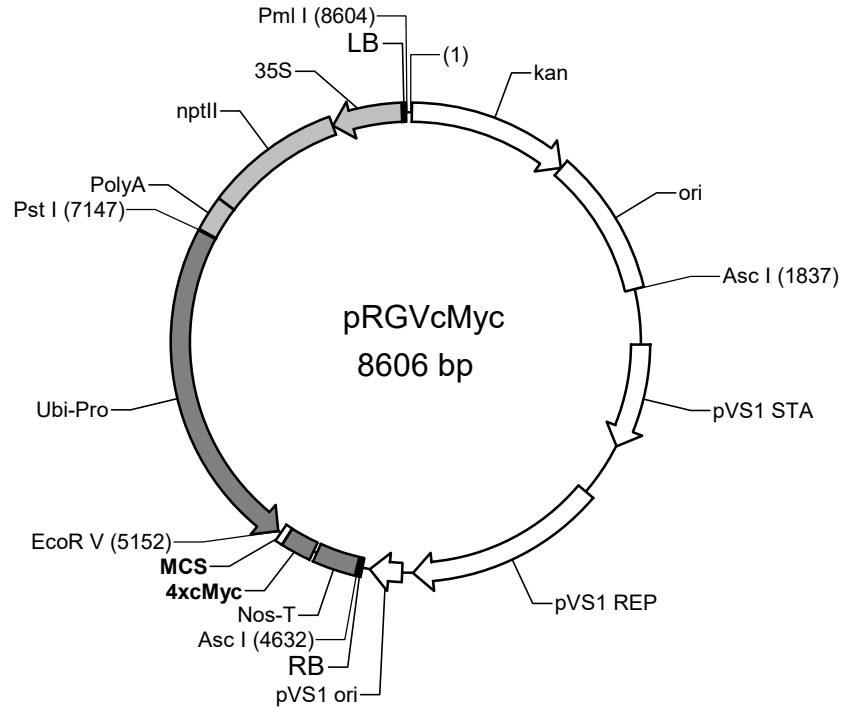

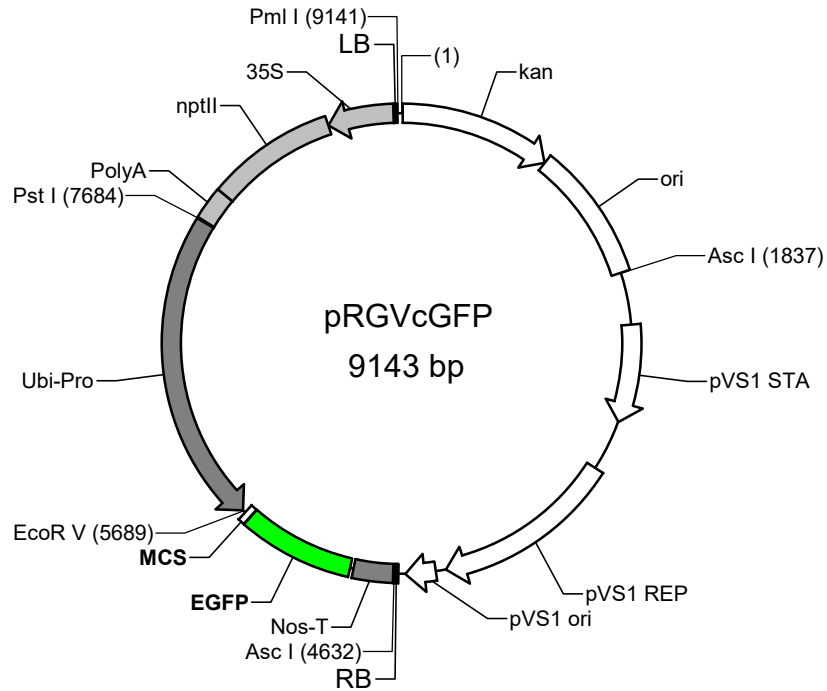

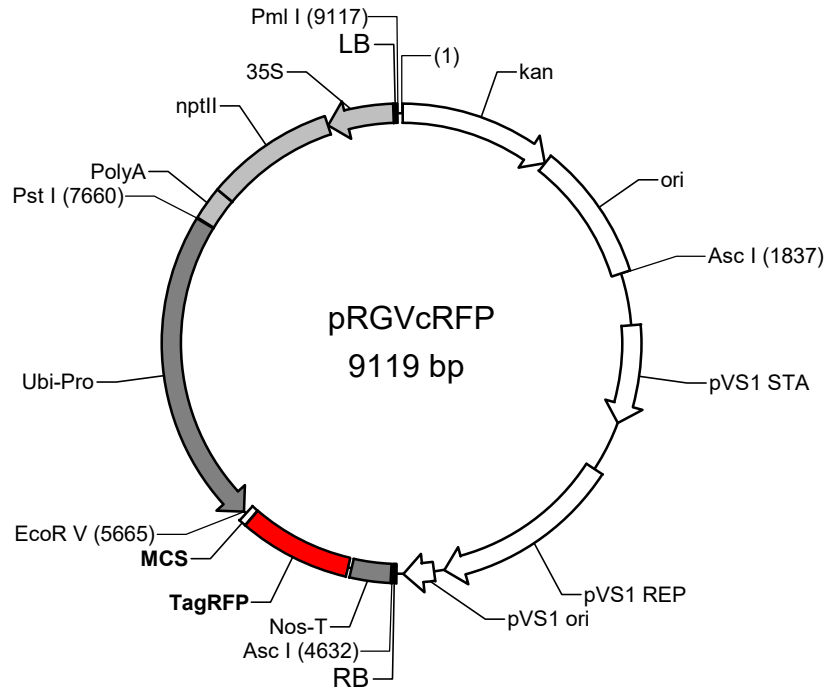

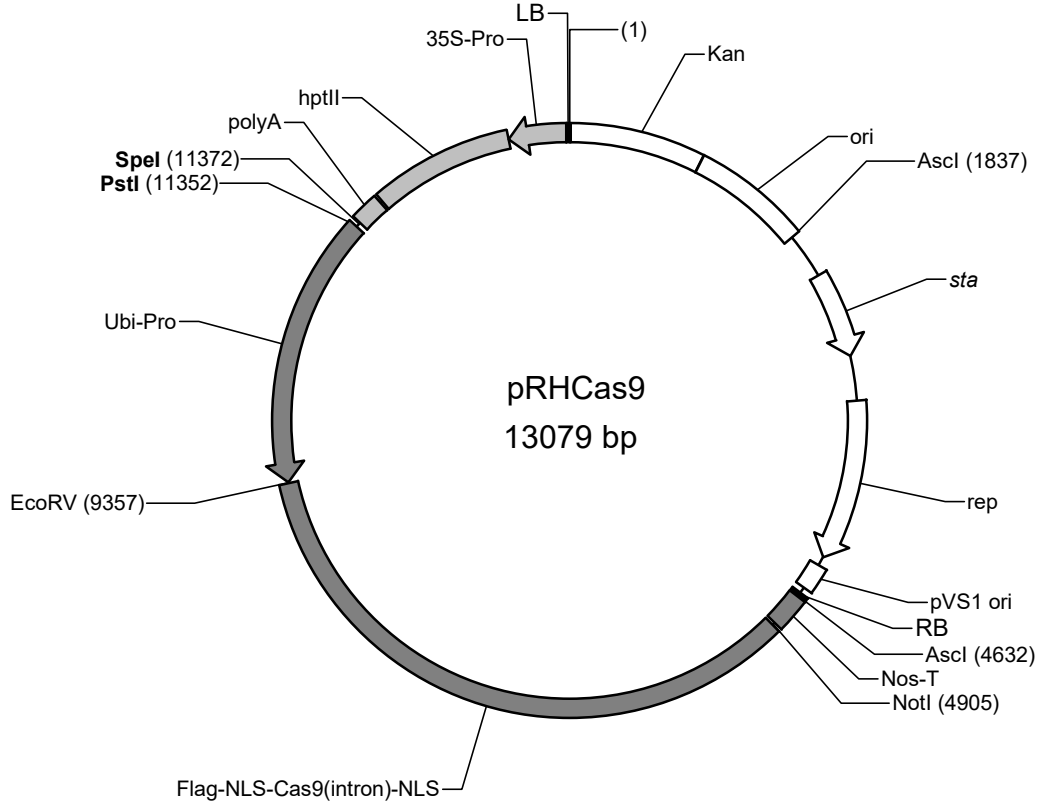

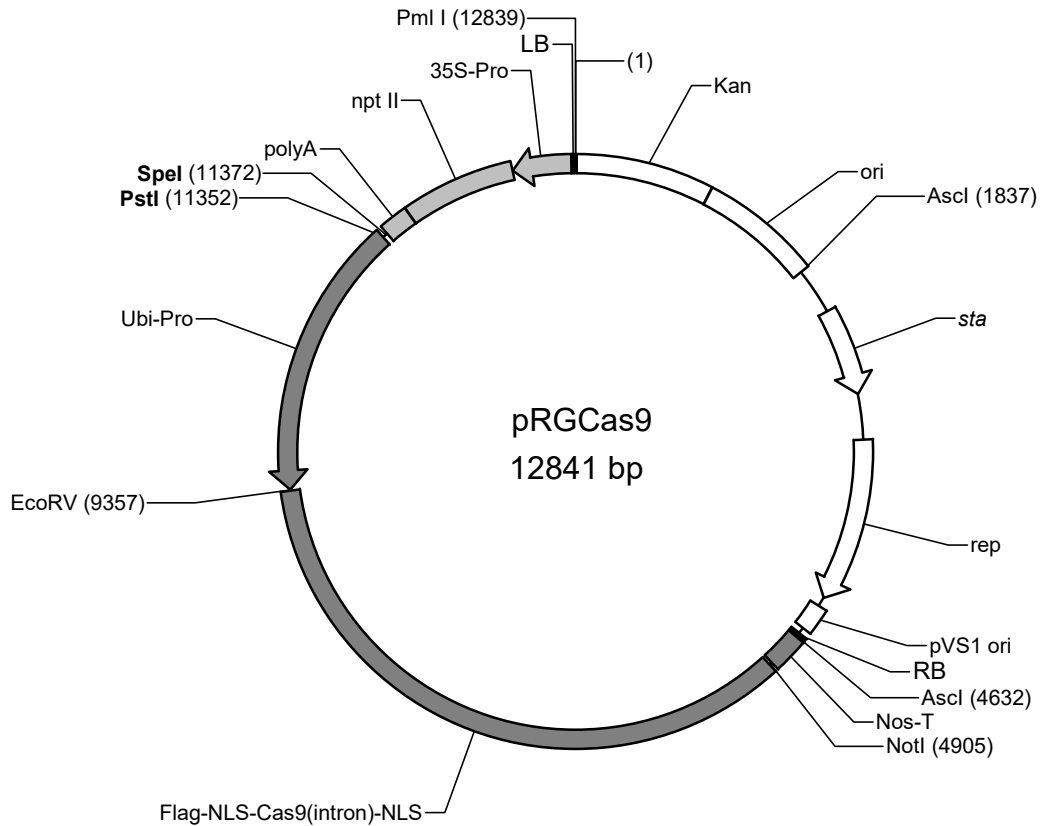

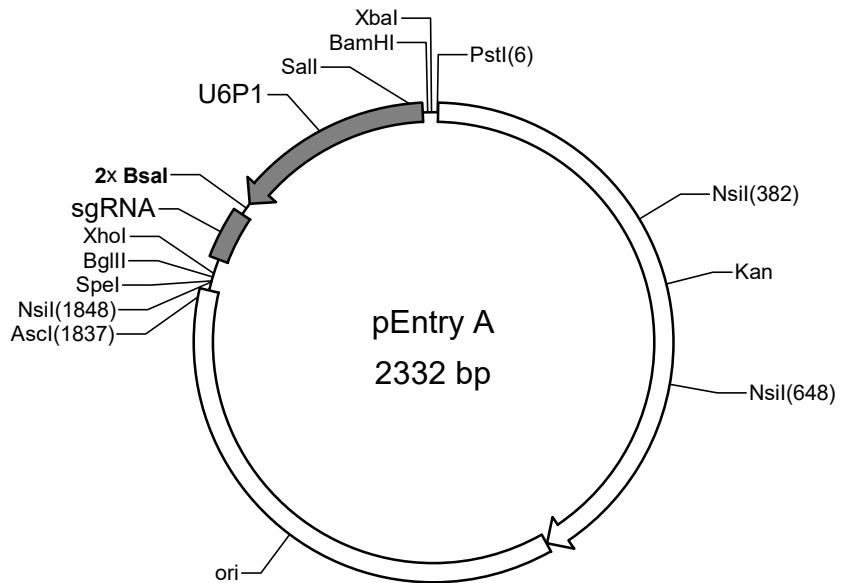



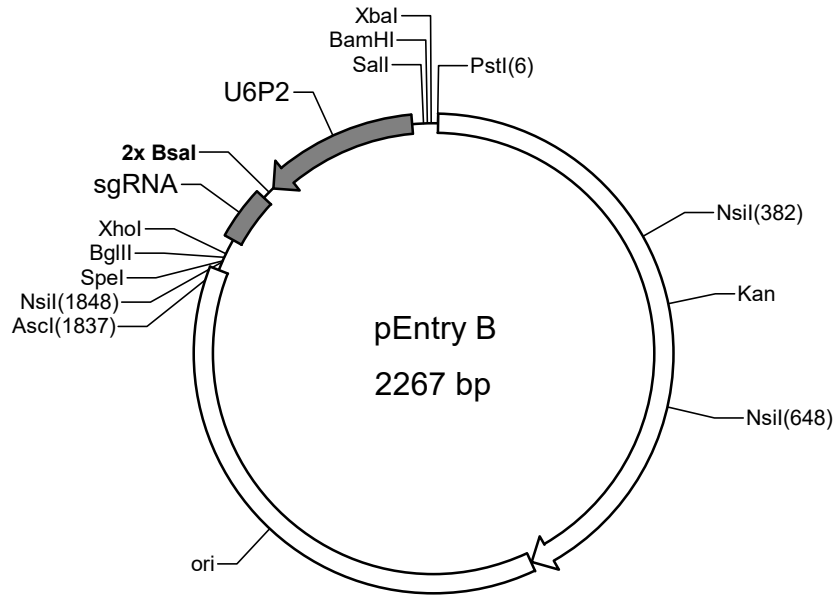

**Figure S3. The sequence structures in the MCS region of the vectors**

The features of upstream and downstream sequences in the MCS region, open reading frames, restriction sites and sequencing primers included.

**pRTE**

-----**Kan complement**----- PstI EcoRV BamHI  
TTTATGTAAGCAGACAGTTTTATTGTTTCATGATGATATATTTTTATCTTGTGCAATGTAACATCAGAGATTTTGAGACAC CTGCAG GATATC CAGATCCAGTG GGA TCC CCG

SmaI SacI KpnI HindIII SpeI NotI **3 Stop** -----**NosT**-----  
GGT GAG CTC GGT ACC AAG CTT ACT AGT GCG GCC Gct aaGtgaGtagATCGTTCAAACATTTGGCAATAAAGTTTCTTAA GATTGAATCCTGTTGCCGGTCT

Sequencing primer: SeqbfkanR GTAAGCAGACAGTTTTATTGTTTCAT; NosR-seq AGACCGCAACAGGATTCAATC

**pRTV/pRHV/pRGV**

-----**Ubi-Pro**----- EcoRV BamHI  
ATTTTTTAGCCCTGCCTTCATACGCATTTTATTTGCTTGGTACTGTTTCTTTTGTGCGATGCTCACCCTGTTGTTTGGTGTACTTATGCAG GATATC CAGATCCAGTG GGA

SmaI SacI KpnI HindIII SpeI NotI **3 Stop** -----**NosT**-----  
TCC CCG GGT GAG CTC GGT ACC AAG CTT ACT AGT GCG GCC Gct aaGtgaGtagATCGTTCAAACATTTGGCAATAAAGTTTCTTAA GATTGAATCCTGTTGCCGGTCT

Sequencing primer: UbiP-seq TTTTAGCCCTGCCTTCATACGC; NosR-seq AGACCGCAACAGGATTCAATC

**pRHE/pRGE**

-----**polyA**-----  
TGTGAGTAGTTCCAGATAAGGGAATTAGGGTTCCTATAGGGTTTCGCTCATGTGTTGAGCATATAAGAAACCCCTTAGTATGTATTTGTATTTGTAAAATACTTCTATCAATAAAA

----- PstI EcoRV BamHI SmaI SacI KpnI HindIII  
TTTCTAATTCCTAAAACAAAATCCAGTACTAAAATCCAGATCCCCGAATTA CTGCAG GATATC CAGATCCAGTG GGA TCC CCG GGT GAG CTC GGT ACC AAG CTT

SpeI NotI **3 Stop** -----**NosT**-----  
ACT AGT GCG GCC Gct aaGtgaGtagATCGTTCAAACATTTGGCAATAAAGTTTCTTAA GATTGAATCCTGTTGCCGGTCT

Sequencing primer: polyA-seq TGTGAGTAGTTCCAGATAAGG; NosR-seq AGACCGCAACAGGATTCAATC

**pRTVnHA/pRHVnHA**

-----**Ubi-Pro**----- EcoRV  
ATTTTTTAGCCCTGCCTTCATACGCATTTTATTTGCTTGGTACTGTTTCTTTTGTGCGATGCTCACCCTGTTGTTTGGTGTACTTATGCAG GATATC ATG TAC CCA TAC GAT

-----**4xHA**-----  
GTT CCA GAC TAC GCT TAC CCA TAC GAC GTT CCA GAC TAC GCT TAC CCA TAC GAC GTT CCA GAC TAC GCT GGT TAC CCA TAC GAC GTT CCA

----- BamHI SmaI SacI KpnI HindIII SpeI NotI **3 Stop** -----**NosT**-----  
GAT TAC GCT GGA TCC CCG GGT GAG CTC GGT ACC AAG CTT ACT AGT GCG GCC Gct aaGtgaGtagATCGTTCAAACATTTGGCAATAAAGTTTCTTAA G

-----  
ATTGAATCCTGTTGCCGGTCT

Sequencing primer: UbiP-seq TTTTAGCCCTGCCTTCATACGC; NosR-seq AGACCGCAACAGGATTCAATC

**pRTVcHA/pRHVcHA/pRGVcHA**

-----**Ubi-Pro**----- EcoRV BamHI  
ATTTTTTAGCCCTGCCTTCATACGCATTTTATTTGCTTGGTACTGTTTCTTTTGTGCGATGCTCACCCTGTTGTTTGGTGTACTTATGCAG GATATC CAGATCCAGTG GGA

SmaI SacI KpnI HindIII SpeI NotI -----**4xHA**-----  
TCC CCG GGT GAG CTC GGT ACC AAG CTT ACT AGT GCG GCC GCT ATG TAC CCA TAC GAT GTT CCA GAC TAC GCT TAC CCA TAC GAC GTT CCA

----- **4 Stop** -----  
GAC TAC GCT TAC CCA TAC GAC GTT CCA GAC TAC GCT GGT TAC CCA TAC GAC GTT CCA GAT TAC GCT tga CGGCCGctaaGtgaGtagATCGTTCAA

-----**NosT**-----  
ACATTTGGCAATAAAGTTTCTTAA GATTGAATCCTGTTGCCGGTCT

Sequencing primer: UbiP-seq TTTTAGCCCTGCCTTCATACGC; NosR-seq AGACCGCAACAGGATTCAATC

**pRHEcHA/pRGEcHA**

-----**polyA**-----  
 TGTGAGTAGTTCACAGATAAGGGAATTAGGGTTCCATAGGGTTTCGCTCATGTGTTGAGCATATAAGAAACCCTTAGTATGTATTTGTATTTGTAAAATACTTCTATCAATAAAA  
 ----- PstI EcoRV BamHI SmaI SacI KpnI HindIII  
 TTTCTAATTCCTAAAACAAAATCCAGTACTAAAATCCAGATCCCCGAATTA CTGCAG GATATC CAGATCCAGTG GGA TCC CCG GGT GAG CTC GGT ACC AAG CTT  
 SpeI NotI -----**4xHA**-----  
 ACT AGT GCG GCC GCT ATG TAC CCA TAC GAT GTT CCA GAC TAC GCT TAC CCA TAC GAC GTT CCA GAC TAC GCT TAC CCA TAC GAC GTT CCA  
 ----- **4 Stop** ----- **NosT** -----  
 GAC TAC GCT GGT TAC CCA TAC GAC GTT CCA GAT TAC GCT tgaCGGCCGctaaGtgaGtagATCGTTCAAACATTTGGCAATAAAGTTTCTTAA GATTGAATCCT  
 -----  
 GTTGCCCGTCT

Sequencing primer: ployA-seq TGTGAGTAGTTCACAGATAAGG; NosR-seq AGACCGCAACAGGATTCAATC

**pRTVnMyc/pRHVnMyc**

-----**Ubi-Pro**----- EcoRV -----  
 ATTTTTTAGCCCTGCCTTCATACGCATATTTATTTGCTTGGTACTGTTTCTTTTGTGCGATGCTCACCCTGTTGTTTGGTGTACTTATGCAG GATATC ATG GAG CAA AAG CTC  
 -----**4xMyc**-----  
 ATT TCT GAA GAG GAC TTG AAT GAA ATG GAG CAA AAG CTC ATT TCT GAA GAG GAC TTG AAT GAA ATG GAG CAA AAG CTC ATT TCT GAA GAG  
 ----- BamHI SmaI -----  
 GAC TTG AAT GAA ATG GAG AGC TTG GGC GAC CTC ACC ATG GAG CAA AAG CTC ATT TCT GAA GAG GAC TTG AAT TCG GGA TCC CCG GGT GAG  
 SacI KpnI HindIII SpeI NotI **3 Stop** ----- **NosT** -----  
 CTC GGT ACC AAG CTT ACT AGT GCG GCC GCT aaGtgaGtagATCGTTCAAACATTTGGCAATAAAGTTTCTTAA GATTGAATCCTGTTGCCGGTCT

Sequencing primer: UbiP-seq TTTTAGCCCTGCCTTCATACGC; NosR-seq AGACCGCAACAGGATTCAATC

**pRTVcMyc/pRHVcMyc**

-----**Ubi-Pro**----- EcoRV BamHI -----  
 ATTTTTTAGCCCTGCCTTCATACGCATATTTATTTGCTTGGTACTGTTTCTTTTGTGCGATGCTCACCCTGTTGTTTGGTGTACTTATGCAG GATATC CAGATCCAGTG GGA  
 SmaI SacI KpnI HindIII SpeI NotI -----**3xMyc**-----  
 TCC CCG GGT GAG CTC GGT ACC AAG CTT ACT AGT GCG GCC GCT ATG GAG CAA AAG CTC ATT TCT GAA GAG GAC TTG AAT GAA ATG GAG CAA  
 -----  
 AAG CTC ATT TCT GAA GAG GAC TTG AAT GAA ATG GAG AGC TTG GGC GAC CTC ACC ATG GAG CAA AAG CTC ATT TCT GAA GAG GAC TTG AAT  
 --- **4 Stop** ----- **NosT** -----  
 TCG tgaCGGCCGctaaGtgaGtagATCGTTCAAACATTTGGCAATAAAGTTTCTTAA GATTGAATCCTGTTGCCGGTCT

Sequencing primer: UbiP-seq TTTTAGCCCTGCCTTCATACGC; NosR-seq AGACCGCAACAGGATTCAATC

**pRHEcMyc**

-----**polyA**-----  
 TGTGAGTAGTTCACAGATAAGGGAATTAGGGTTCCATAGGGTTTCGCTCATGTGTTGAGCATATAAGAAACCCTTAGTATGTATTTGTATTTGTAAAATACTTCTATCAATAAAA  
 ----- PstI EcoRV BamHI SmaI SacI KpnI HindIII  
 TTTCTAATTCCTAAAACAAAATCCAGTACTAAAATCCAGATCCCCGAATTA CTGCAG GATATC CAGATCCAGTG GGA TCC CCG GGT GAG CTC GGT ACC AAG CTT  
 SpeI NotI -----**3xMyc**-----  
 ACT AGT GCG GCC GCT ATG GAG CAA AAG CTC ATT TCT GAA GAG GAC TTG AAT GAA ATG GAG CAA AAG CTC ATT TCT GAA GAG GAC TTG AAT  
 ----- **4 Stop** ----- **NosT** -----  
 GAA ATG GAG AGC TTG GGC GAC CTC ACC ATG GAG CAA AAG CTC ATT TCT GAA GAG GAC TTG AAT TCG tgaCGGCCGctaaGtgaGtagATCGTTCAAACATTT  
 -----  
 TGGCAATAAAGTTTCTTAA GATTGAATCCTGTTGCCGGTCT

Sequencing primer: ployA-seq TGTGAGTAGTTCACAGATAAGG; NosR-seq AGACCGCAACAGGATTCAATC

**pRGEcMyc**

-----**polyA**-----  
 TGTGAGTAGTTCCAGATAAGGGAATTAGGGTTCCATAGGGTTTCGCTCATGTGTTGAGCATATAAGAAACCCTTAGTATGTATTTGTATTTGTAAATACTTCTATCAATAAAA  
 ----- PstI EcoRV BamHI SmaI SacI KpnI HindIII  
 TTTCTAATTCCTAAAACAAAATCCAGTACTAAAATCCAGATCCCCGAATTA CTGCAG GATATC CAGATCCAGTG GGA TC CCG GGT GAG CTC GGT ACC AAG CTC  
 SpeI NotI -----  
 ACT AGT GCG GCC GCT ATG GAG CAA AAG CTC ATT TCT GAA GAG GAC TTG AAT GAA ATG GAG CAA AAG CTC ATT TCT GAA GAG GAC TTG AAT  
 -----**4xMyc**-----  
 GAA ATG GAG CAA AAG CTC ATT TCT GAA GAG GAC TTG AAT GAA ATG GAG AGC TTG GGC GAC CTC ACC ATG GAG CAA AAG CTC ATT TCT GAA  
 -----**4 Stop**-----**-NosT-**-----  
 GAG GAC TTG AAT TCG tgaCGGCCGctaaGtgaGtagATCGTTCAAACATTTGGCAATAAAGTTTCTTAA GATTGAATCCTGTTGCCGGTCT

Sequencing primer: polyA-seq TGTGAGTAGTTCCAGATAAGG; NosR-seq AGACCGCAACAGGATTCAATC

**pRGVcMyc**

-----**Ubi-Pro**----- EcoRV BamHI  
 ATTTTTTAGCCCTGCCTTCATACGCATTTTATTTGCTTGGTACTGTTTCTTTTGTGCGATGCTCACCCTGTTGTTTGGTGTACTTATGCAG GATATC CAGATCCAGTG GGA  
 SmaI SacI KpnI HindIII SpeI NotI -----  
 TC CCG GGT GAG CTC GGT ACC AAG CTT ACT AGT GCG GCC GCT ATG GAG CAA AAG CTC ATT TCT GAA GAG GAC TTG AAT GAA ATG GAG CAA  
 -----**4xMyc**-----  
 AAG CTC ATT TCT GAA GAG GAC TTG AAT GAA ATG GAG CAA AAG CTC ATT TCT GAA GAG GAC TTG AAT GAA ATG GAG AGC TTG GGC GAC CTC  
 -----**4 Stop**-----**-NosT-**-----  
 ACC ATG GAG CAA AAG CTC ATT TCT GAA GAG GAC TTG AAT TCG tgaCGGCCGctaaGtgaGtagATCGTTCAAACATTTGGCAATAAAGTTTCTTAA GATTGAA  
 TCCTGTTGCCGGTCT

Sequencing primer: UbiP-seq TTTTAGCCCTGCCTTCATACGC; NosR-seq AGACCGCAACAGGATTCAATC

**pRTVnGFP/pRHVnGFP**

-----**Ubi-Pro**----- EcoRV -----**EGFP**-----  
 GTCGATGCTCACCCTGTTGTTTGGTGTACTTATGCAG GATATC ATG GTG AGC AAG GGC GAG GAG CTG TTC ACC---AAG CGC GAT CAC ATG GTC CTG CTG  
 BamHI SmaI SacI KpnI HindIII SpeI  
 GAG TTC GTG ACC GCC GCC GGG ATC ACT CTC GGC ATG GAC GAG CTG TAC AAG GGA TC CCG GGT GAG CTC GGT ACC AAG CTT ACT AGT GCG  
 NotI **3 Stop** -----**-NosT-**-----  
 GCC GCT aaGtgaGtagATCGTTCAAACATTTGGCAATAAAGTTTCTTAA GATTGAATCCTGTTGCCGGTCT

Sequencing primer: EGFP/Venus-Seq GCGATCACATGGTCTCTGC; NosR-seq AGACCGCAACAGGATTCAATC

**pRTVcGFP/pRHVcGFP/pRGVcGFP**

-----**Ubi-Pro**----- EcoRV BamHI  
 ATTTTTTAGCCCTGCCTTCATACGCATTTTATTTGCTTGGTACTGTTTCTTTTGTGCGATGCTCACCCTGTTGTTTGGTGTACTTATGCAG GATATC CAGATCCAGTG GGA  
 SmaI SacI KpnI HindIII SpeI NotI -----  
 TC CCG GGT GAG CTC GGT ACC AAG CTT ACT AGT GCG GCC GCT ATG GTG AGC AAG GGC GAG GAG CTG TTC ACC GGG GTG GTG CCC ATC CTG  
 -----**EGFP**-----**4 Stop**-----**-NosT-**-----  
 GTC GAG CTG GAC GGC GAC GTA AAC GGC CAC AAG TTC AGC---ACT CTC GGC ATG GAC GAG CTG TAC AAG taaCGGCCGctaaGtgaGtagATCGT

Sequencing primer: UbiP-seq TTTTAGCCCTGCCTTCATACGC; Venus/GFP/CFPseqR AACTTGTGGCCGTTTACGTCG

**pRTEcYFP**

-----**Kan complement**----- PstI EcoRV BamHI  
TTTATGTAAGCAGACAGTTTTATTGTTTCATGATGATATATTTTTATCTTGTGCAATGTAACATCAGAGATTTTGAGACAC CTGCAG GATATC CAGATCCAGTG GGA TCC CCG

SmaI SacI KpnI HindIII SpeI NotI -----**mVenus**-----  
GGT GAG CTC GGT ACC AAG CTT ACT AGT GCG GCC GCT ATG GTG AGC AAG GGC GAG GAG CTG TTC ACC GGG GTG GTG CCC ATC CTG GTC GAG

CTG GAC GGC GAC GTA AAC GGC CAC AAG TTC AGC---GGC ATG GAC GAG CTG TAC AAG TAACGGCCGCTaaGtgaGtagATCGTTCAAACATTGGCAATAAAGTT

Sequencing primer: SeqbfkanR GTAAGCAGACAGTTTTATTGTTTCAT; Venus/GFP/CFPseqR AACTTGTGGCCGTTTACGTCG

**pRTVnYFP**

-----**Ubi-Pro**----- EcoRV -----**mVenus**-----  
GTCGATGCTCACCCGTGTTGTTGGTGTACTTATGCAG GATATC ATG GTG AGC AAG GGC GAG GAG CTG TTC ACC---AAG C GGC GAT CAC ATG GTC CTG CTG

BamHI SmaI SacI KpnI HindIII SpeI  
GAG TTC GTG ACC GCC GCC GGG ATC ACT CTC GGC ATG GAC GAG CTG TAC AAG GGA TCC CCG GGT GAG CTC GGT ACC AAG CTT ACT AGT GCG

NotI **3 Stop** -----**NosT**-----  
GCC GCT aaGtgaGtagATCGTTCAAACATTGGCAATAAAGTTTCTTAA GATTGAATCCTGTGCGCGTCT

Sequencing primer: EGFP/Venus-Seq GCGATCACATGGTCTCTGC; NosR-seq AGACCGCAACAGGATTCAATC

**pRTVcYFP**

-----**Ubi-Pro**----- EcoRV BamHI  
ATTTTTTAGCCCTGCCTTCATACGCATATTTATTTGCTTGGTACTGTTTCTTTTGTGCGATGCTCACCCGTGTTGTTGGTGTACTTATGCAG GATATC CAGATCCAGTG GGA

SmaI SacI KpnI HindIII SpeI NotI -----  
TCC CCG GGT GAG CTC GGT ACC AAG CTT ACT AGT GCG GCC GCT ATG GTG AGC AAG GGC GAG GAG CTG TTC ACC GGG GTG GTG CCC ATC CTG

-----**mVenus**----- **4 Stop** -----**NosT**-----  
GTC GAG CTG GAC GGC GAC GTA AAC GGC CAC AAG TTC AGC---ACT CTC GGC ATG GAC GAG CTG TAC AAG taaCGGCCGCTaaGtgaGtagATCGT

Sequencing primer: UbiP-seq TTTTAGCCCTGCCTTCATACGC; Venus/GFP/CFPseqR AACTTGTGGCCGTTTACGTCG

**pRHEcYFP/pRGEcYFP**

-----**polyA**-----  
TGTGAGTAGTTCCAGATAAAGGAATTAGGGTTCCTATAGGGTTTCGTCATGTGTTGAGCATATAAGAAACCCCTTAGTATGTATTGTTTGTAAAATACTTCTATCAATAAAA

----- PstI EcoRV BamHI SmaI SacI KpnI HindIII  
TTTCTAATTCCTAAAACAAAATCCAGTACTAAAATCCAGATCCCCGAATTA CTGCAG GATATC CAGATCCAGTG GGA TCC CCG GGT GAG CTC GGT ACC AAG CTT

SpeI NotI -----**mVenus**-----  
ACT AGT GCG GCC GCT ATG GTG AGC AAG GGC GAG GAG CTG TTC ACC GGG GTG GTG CCC ATC CTG GTC GAG CTG GAC GGC GAC GTA AAC GGC

----- **4 Stop** -----**NosT**-----  
CAC AAG TTC AGC---ACT CTC GGC ATG GAC GAG CTG TAC AAG taaCGGCCGCTaaGtgaGtagATCGT

Sequencing primer: ployA-seq TGTGAGTAGTTCCAGATAAAGG; Venus/GFP/CFPseqR AACTTGTGGCCGTTTACGTCG

**pRTVnRFP**

-----**Ubi-Pro**----- EcoRV -----**TagRFP**-----  
GTCGATGCTCACCCGTGTTGTTGGTGTACTTATGCAG GATATC ATG AGC GAG CTG ATT AAG GAG AAC ATG CAC---AAA GAG ACC TAC GTC GAG CAG CAC

BamHI SmaI SacI KpnI HindIII SpeI  
GAG GTG GCT GTG GCC AGA TAC TGC GAC CTC CCT AGC AAA CTG GGG CAC AAG GGA TCC CCG GGT GAG CTC GGT ACC AAG CTT ACT AGT GCG

NotI **3 Stop** -----**NosT**-----  
GCC GCT aaGtgaGtagATCGTTCAAACATTGGCAATAAAGTTTCTTAA GATTGAATCCTGTGCGCGTCT

Sequencing primer: tRFP-Seq AGAGACCTACGTCGAGCAGC ; NosR-seq AGACCGCAACAGGATTCAATC

pRTVcRFP/pRHVcRFP/pRGVcRFP

-----Ubi-Pro----- EcoRV BamHI  
 ATTTTTTAGCCCTGCCTTCATACGCATTTTATTGCTTGGTACTGTTTCTTTTGTGCGATGCTCACCCTGTTGTTGGTGTACTTATGCAG GATATC CAGATCCAGTG GGA  
 SmaI SacI KpnI HindIII SpeI NotI -----  
 TCC CCG GGT GAG CTC GGT ACC AAG CTT ACT AGT GCG GCC GCT ATG AGC GAG CTG ATT AAG GAG AAC ATG CAC ATG AAG CTG TAC ATG GAG

-----TagRFP----- 4 Stop -----NosT-----  
 GGC ACC GTG AAC AAC CAC CAC TTC AAG--- GAC CTC CCT AGC AAA CTG GGG CAC AAG tgaCGGCCGctaaGtgaGtagATCGT

Sequencing primer: UbiP-seq TTTTAGCCCTGCCTTCATACGC; tRFPseqR AAGTGGTGGTTGTTCCAGGTGC

pRTVnVN

-----Ubi-Pro----- EcoRV -----  
 ATTTTTTAGCCCTGCCTTCATACGCATTTTATTGCTTGGTACTGTTTCTTTTGTGCGATGCTCACCCTGTTGTTGGTGTACTTATGCAG GATATC ATG GTG AGC AAG GGC  
 -----mVenus N(1-155)----- -----HA----- BamHI SmaI SacI  
 GAG GAG CTG TTC ACC---AGC CAC AAC GCC TAT CTC ACC GCC GAC TAC CCA TAC GAT GTT CCA GAT TAC GCT GGA TCC CCG GGT GAG CTC

KpnI HindIII SpeI NotI 3 Stop -----NosT-----  
 GGT ACC AAG CTT ACT AGT GCG GCC Gct aaGtgaGtagATCGTTCAAACATTGGCAATAAAGTTTCTTAAAGATTGAATCCTGTTGCCGGTCT

Sequencing primer: UbiP-seq TTTTAGCCCTGCCTTCATACGC; NosR-seq AGACCGCAACAGGATTCAATC

pRTVnVC

-----Ubi-Pro----- EcoRV -----mVenus C(156-238)-----  
 GTCGATGCTCACCCTGTTGTTGGTGTACTTATGCAG GATATC ATG AAG CAG AAG AAC GGC ATC AAG GCC AAC---GTC CTG CTG GAG TTC GTG ACC GCC  
 -----cMyc----- BamHI SmaI SacI  
 GCC GGG ATC ACT CTC GGC ATG GAC GAG CTG TAC AAG GAG CAA AAG CTC ATT TCT GAA GAG GAC TTG AAT GAA GGA TCC CCG GGT GAG CTC

KpnI HindIII SpeI NotI 3 Stop -----NosT-----  
 GGT ACC AAG CTT ACT AGT GCG GCC Gct aaGtgaGtagATCGTTCAAACATTGGCAATAAAGTTTCTTAAAGATTGAATCCTGTTGCCGGTCT

Sequencing primer: VC-Seq TCCTGCTGGAGTTCGTGACC; NosR-seq AGACCGCAACAGGATTCAATC

pRTVcVN

-----Ubi-Pro----- EcoRV BamHI  
 ATTTTTTAGCCCTGCCTTCATACGCATTTTATTGCTTGGTACTGTTTCTTTTGTGCGATGCTCACCCTGTTGTTGGTGTACTTATGCAG GATATC CAGATCCAGTG GGA  
 SmaI SacI KpnI HindIII SpeI NotI -----HA-----  
 TCC CCG GGT GAG CTC GGT ACC AAG CTT ACT AGT GCG GCC GCT TAC CCA TAC GAT GTT CCA GAT TAC GCT GTG AGC AAG GGC GAG GAG CTG

-----mVenus N(1-155)----- 4 Stop -----NosT-----  
 TTC ACC---AAC AGC CAC AAC GCC TAT CTC ACC GCC GAC taaCGGCCGctaaGtgaGtagATCGTTCAAACATTGGCAATAAAGTTTCTTAAAGATTGAATCCTGTT

-----  
GCCGGTCT

Sequencing primer: UbiP-seq TTTTAGCCCTGCCTTCATACGC; NosR-seq AGACCGCAACAGGATTCAATC

pRTVcVC

-----Ubi-Pro----- EcoRV BamHI  
 ATTTTTTAGCCCTGCCTTCATACGCATTTTATTGCTTGGTACTGTTTCTTTTGTGCGATGCTCACCCTGTTGTTGGTGTACTTATGCAG GATATC CAGATCCAGTG GGA  
 SmaI SacI KpnI HindIII SpeI NotI -----cMyc-----  
 TCC CCG GGT GAG CTC GGT ACC AAG CTT ACT AGT GCG GCC GCT GAG CAA AAG CTC ATT TCT GAA GAG GAC TTG AAT GAA AAG CAG AAG AAC

-----mVenus C(156-238)----- 4 Stop -----NosT-----  
 GGC ATC AAG GCC AAC TTC AAG ATC CGC CAC AAC ATC GAG GAC---ATC ACT CTC GGC ATG GAC GAG CTG TAC AAG taaCGGCCGctaaGtgaGtagATCGT

Sequencing primer: UbiP-seq TTTTAGCCCTGCCTTCATACGC; VC seqR CGATGTTGGCGGATCTTGA

**pEntry A**

-----**Kan complement**----- PstI XbaI BamHI SalI  
TTTATGTAAGCAGACAGTTTTATTGTTTCATGATGATATATTTTTATCTTGTGCAATGTAACATCAGAGATTTTGAGACAC CTGCAG TCTAGA GGATCC GTCGAC  
-----**U6P1**----- **2xBsaI** -----**sgRNA**----- XhoI BglII SpeI NsiI  
AAGAACGAAC TAAGCCGGAC---GCGCTGCCGCTT**GTGT**AgagaccAAAGGAggtctc**AGTTT**TAGAGCTAGAAATAG---CTGCAG AGATCT ACTAGT ATGCAT--

Sequencing primer: SeqbfkanR GTAAGCAGACAGTTTTATTGTTTCAT

**pEntry B**

-----**Kan complement**----- PstI XbaI BamHI SalI  
TTTATGTAAGCAGACAGTTTTATTGTTTCATGATGATATATTTTTATCTTGTGCAATGTAACATCAGAGATTTTGAGACAC CTGCAG TCTAGA GGATCC GTCGAC  
-----**U6P2**----- **2xBsaI** -----**sgRNA**----- XhoI BglII SpeI NsiI  
TGCTGGAATTGCCCTTGGAT---GCGCTGTCGCTT**GTGT**AgagaccAAAGGAggtctc**AGTTT**TAGAGCTAGAAATAG---CTGCAG AGATCT ACTAGT ATGCAT--

Sequencing primer: SeqbfkanR GTAAGCAGACAGTTTTATTGTTTCAT

**pRHCas9/pRGCas9**

-----**Ubi-Pro complement**----- PstI BamHI  
AAAATATGTGGTAATTTTTATAACTTAGACATGCAATGCTCATTATCTCTAGAGAGGGGCACGACCGGTCACGCTGCA CTGCAG ACGTGA GGATCC ACTGAG  
SpeI -----**polyA Complement**-----  
ACTAGT ATGCAG TAATTCGGGGGATCTGGATTTTAGTACTGGATTTTGGTT

Sequencing primer: SeqbfUbiR GGTAATTTTTTATAACTTAGACATGC



**Table S1. List of the 42 vectors generated in this study**

| No. | Vector name | Description                                                                |
|-----|-------------|----------------------------------------------------------------------------|
| 1   | pRTE        | Transient expression, without Ubi promoter, tag free                       |
| 2   | pRTEcYFP    | Transient expression, without Ubi promoter, C terminal mVenus tag          |
| 3   | pRTV        | Transient over-expression, Ubi promoter, tag free                          |
| 4   | pRTVnHA     | Transient over-expression, Ubi promoter, N terminal 4×HA tag               |
| 5   | pRTVnMyc    | Transient over-expression, Ubi promoter, N terminal 4×cMyc tag             |
| 6   | pRTVnGFP    | Transient over-expression, Ubi promoter, N terminal EGFP tag               |
| 7   | pRTVnYFP    | Transient over-expression, Ubi promoter, N terminal mVenus tag             |
| 8   | pRTVnRFP    | Transient over-expression, Ubi promoter, N terminal TagRFP tag             |
| 9   | pRTVcHA     | Transient over-expression, Ubi promoter, C terminal 4×HA tag               |
| 10  | pRTVcMyc    | Transient over-expression, Ubi promoter, C terminal 3×cMyc tag             |
| 11  | pRTVcGFP    | Transient over-expression, Ubi promoter, C terminal EGFP tag               |
| 12  | pRTVcYFP    | Transient over-expression, Ubi promoter, C terminal mVenus tag             |
| 13  | pRTVcRFP    | Transient over-expression, Ubi promoter, C terminal TagRFP tag             |
| 14  | pRTVnVN     | Transient BiFC, N terminal mVenusN-HA tag                                  |
| 15  | pRTVnVC     | Transient BiFC, N terminal mVenusC-cMyc tag                                |
| 16  | pRTVcVN     | Transient BiFC, C terminal HA-mVenusN tag                                  |
| 17  | pRTVcVC     | Transient BiFC, C terminal cMyc-mVenusC tag                                |
| 18  | pRHE        | Stable expression, Hygromycin, without Ubi promoter, tag free              |
| 19  | pRHEcHA     | Stable expression, Hygromycin, without Ubi promoter, C terminal 4×HA tag   |
| 20  | pRHEcMyc    | Stable expression, Hygromycin, without Ubi promoter, C terminal 3×cMyc tag |
| 21  | pRHEcYFP    | Stable expression, Hygromycin, without Ubi promoter, C terminal mVenus tag |
| 22  | pRHV        | Stable over-expression, Hygromycin, Ubi promoter, tag free                 |
| 23  | pRHVnHA     | Stable over-expression, Hygromycin, Ubi promoter, N terminal 4×HA tag      |
| 24  | pRHVnMyc    | Stable over-expression, Hygromycin, Ubi promoter, N terminal 4×cMyc tag    |
| 25  | pRHVnGFP    | Stable over-expression, Hygromycin, Ubi promoter, N terminal EGFP tag      |
| 26  | pRHVcHA     | Stable over-expression, Hygromycin, Ubi promoter, C terminal 4×HA tag      |
| 27  | pRHVcMyc    | Stable over-expression, Hygromycin, Ubi promoter, C terminal 3×cMyc tag    |
| 28  | pRHVcGFP    | Stable over-expression, Hygromycin, Ubi promoter, C terminal EGFP tag      |
| 29  | pRHVcRFP    | Stable over-expression, Hygromycin, Ubi promoter, C terminal TagRFP tag    |
| 30  | pRGE        | Stable expression, G418, without Ubi promoter, tag free                    |
| 31  | pRGEcHA     | Stable expression, G418, without Ubi promoter, C terminal 4×HA tag         |
| 32  | pRGEcMyc    | Stable expression, G418, without Ubi promoter, C terminal 4×cMyc tag       |
| 33  | pRGEcYFP    | Stable expression, G418, without Ubi promoter, C terminal mVenus tag       |
| 34  | pRGV        | Stable over-expression, G418, Ubi promoter, tag free                       |
| 35  | pRGVcHA     | Stable over-expression, G418, Ubi promoter, C terminal 4×HA tag            |
| 36  | pRGVcMyc    | Stable over-expression, G418, Ubi promoter, C terminal 4×cMyc tag          |
| 37  | pRGVcGFP    | Stable over-expression, G418, Ubi promoter, C terminal EGFP tag            |
| 38  | pRGVcRFP    | Stable over-expression, G418, Ubi promoter, C terminal TagRFP tag          |
| 39  | pRHCas9     | Stable genome editing, Hygromycin, Ubi promoter, 3×Flag-NLS-Cas9-NLS       |
| 40  | pRGCas9     | Stable genome editing, G418, Ubi promoter, 3×Flag-NLS-Cas9-NLS             |
| 41  | pEntry A    | Entry vector for construction U6P1-sgRNA scaffold                          |
| 42  | pEntry B    | Entry vector for construction U6P2-sgRNA scaffold                          |

**Table S2. List of all primers used in this paper**

| Primer name | Sequence                                                                     | RE site    | Featrues                                |
|-------------|------------------------------------------------------------------------------|------------|-----------------------------------------|
| P1          | ATAT CTGCAG GTGTCTCAAAATCTCTGATGTTAC                                         | PstI       | for kan and puc ori, F                  |
| P2-3        | ATAT GGC GCGCC GGGCGCTCTCCGCTTCCT                                            | AscI       | for kan and puc ori, R                  |
| P3          | CG GGATCCCCGGGT GAGCTC GGTACC AAGCTT ACTAGT GCGGCCGCT TAAGATCGTTCAAACATTTGGC | MCS        | for MCS and NOST, F                     |
| P3+         | ACTG GCG GCC GCT AAG TGA GTA GATCGTTCAAACATTTGGC                             | NotI       | for 3 Stop codon                        |
| P4-3        | ACTG GGC GCGCC CCGATCTAGTAACATA                                              | AscI       | for MCS and NOST, R                     |
| P5          | ACTG GATATC ATG TAC CCA TAC GAT GTT                                          | EcoRV      | for multiple HA tag, F                  |
| P6          | ATCG GGATCC AGCGTAATCTGGAAC                                                  | BamHI      | for multiple HA tag, R                  |
| P7          | ACTG GATATC ATG GAG CAA AAG CTC                                              | EcoRV      | for multiple cMyc tag, F                |
| P8          | ATCG GGATCC CGAATTCAAGTCCTC                                                  | BamHI      | for multiple cMyc tag, R                |
| P9          | ACTG GATATC ATGGTGAGCAAGGGCGA                                                | EcoRV      | for multi-fluorescence.except tagRFP, F |
| P10         | ATCG GGATCC CTTGTACAGCTCGTCCATGC                                             | BamHI      | for multi-fluorescence.except tagRFP, R |
| P11         | CCA ATGCAT GATATC ATGAGCGAGCTGATTAAG                                         | NsiI,EcoRV | for tagRFP, F                           |
| P12         | ATCG GGATCC CTTGTGCCCCAGTTTGCTA                                              | BamHI      | for tagRFP, R                           |
| P13         | CG GGATCC AGCGTAATCTGGAACATCGTATGGGTA GTCGGCGGTGAGATAGGCGTTG                 | BamHI      | mVenusN155-HA R                         |
| P14-2       | ACTG GATATC ATG AAGCAGAAGAACGGCATCA                                          | EcoRV      | for mVenusC155-F with ATG               |
| P15         | CG GGATCC TTCATTCAAGTCTCTTCAGAAATGAGCTTTTGCTC CTTGTACAGCTCGTCCATGCCG         | BamHI      | mVenusC155-Myc R                        |
| P5-2        | actg GCGGCCGC T ATG TAC CCA TAC GAT GTT                                      | NotI       | for HA, F, c-tag                        |
| P6-2        | ACTG CGGCCG TCA AGCGTAATCTGGAACGTC                                           | EagI       | for HA, R, c-tag                        |
| P7-2        | actg GCGGCCGC T ATG GAG CAA AAG CTC                                          | NotI       | for cMyc, F, c-tag                      |
| P8-2        | ACTG CGGCCG TCA CGAATTCAAGTCCTC                                              | EagI       | for cMyc, R, c-tag                      |
| P9-2        | actg GCGGCCGC T ATGGTGAGCAAGGGCGA                                            | NotI       | for multiflor.except tagRFP, F, c-tag   |
| P10-2       | ACTG CGGCCG TTAATTGTACAGCTCGTCCATG                                           | EagI       | for multiflor.except tagRFP, R, c-tag   |
| P11-2       | actg GCGGCCGC T ATGAGCGAGCTGATTAAG                                           | NotI       | for tagRFP, F, c-tag                    |

| Primer name | Sequence                                                                | RE site    | Featrues                                 |
|-------------|-------------------------------------------------------------------------|------------|------------------------------------------|
| P12-2       | ACTG CGGCCG TCACTTGTGCCCCAGTTTG                                         | EagI       | for tagRFP, R, c-tag                     |
| P9-3        | actg GCGGCCGC T TACCCATACGATGTTCCAGATTACGCT GTGAGCAAGGGCGAGGAGCT        | NotI       | for BIFC VN, F, c-tag, HA tag            |
| P13-2       | ACTG CGGCCG TTA GTCGGCGGTGAGATAGGCGT                                    | EagI       | for BIFC VN, R, c-tag,                   |
| P14-3       | actg GCGGCCGC T GAGCAAAAGCTCATTCTGAAGAGGACTTGAATGAA AAGCAGAAGAACGGCATCA | NotI       | for BIFC Vc, F, c-tag, Myc tag           |
| P18         | ACTG CTGCAG TGCAGCGTGACC                                                | PstI       | for Ubip promoter, F                     |
| P19-2       | ACTG GATATC CTGCATAAGTAACACCAAAACAACAGG                                 | EcoRV      | for Ubip promoter, R                     |
| P20-4       | ACTG GCGCGCC TGACAGGATATATTGGCGGGTAAAC TAGGCGCTTTTTGCAGCTCTTC           | AseI       | for T-DNA RB+pVS1 ori complement, F      |
| P21MR       | TCGTGGCAAGCGTCCGCTGATCGAAT                                              |            | mutant NotI between pVS1 Rep and sta     |
| P22MF       | ATTTCGATCAGCGGACGCTTGCCACGA                                             |            | mutant NotI between pVS1 Rep and sta     |
| P23-2       | ATAT GCGCGCC GAATGAACGCCAAGAGGAACA                                      | AseI       | for PVS1 sta, R                          |
| P24-2       | CCA ATGCAT TGGCAGGATATATTGTGGTGAAACA AACATGGTGGAGCACGACA                | NsiI       | for T-DNA LB and 35S, F                  |
| P24-3       | CCA ATGCAT cacgtg TGGCAGGATATATTGTGGTGTA                                | NsiI, PmlI | for T-DNA LB and 35S, F, add PmlI        |
| P25         | TGTCCTCTCAAATGAAATG                                                     |            | for 35S promoter, R                      |
| P26         | GATCTGTCGATCGACAAGCT                                                    |            | for polyA, F                             |
| P27-2       | ACTG CTGCAG TAATTCGGGGGATCTGGA                                          | PstI       | for polyA,R                              |
| P27-3       | ACTG ATGCAT TAATTCGGGGGATCTGGA                                          | NsiI       | for polyA,R                              |
| P28         | CATTTGGAGAGGACA ATGAAAAAGCCTGAAC                                        |            | for hptII, F                             |
| P29         | GATCGACAGATC CTATTTCTTTGCCCTCGGAC                                       |            | for hptII, R                             |
| P32         | CATTTGGAGAGGACA ATGGTGAAGCAAGGGCGA                                      |            | for BiFC ECFP/mCherry fusion to 35S, F   |
| P33         | GATCGACAGATC TCACTTGTACAGCTCGTCCATGCCG                                  |            | for BiFC ECFP/mCherry fusion to polyA, R |
| P34-2       | CCA ATGCAT AACATGGTGGAGCACGACA                                          | NsiI       | for BiFC 35S promoter, F                 |
| P39-2       | AGTT ctgcag TCTAGA GGATCC GTCGAC AAGAACGAACTAAGCCGGAC                   | MCS        | construct sgRNA 1 cassette, F            |
| P40-3       | TGAGACCTCCTTTGGTCTCT AACACAAGCGGCAGCGC                                  |            | construct sgRNA 1 cassette, MR           |
| P41-3       | AgagaccAAAGGAggtctcAGTTTTAGAGCTAGAAATAG                                 |            | construct sgRNA 1 cassette, MF           |

| Primer name  | Sequence                                                     | RE site   | Featrues                                        |
|--------------|--------------------------------------------------------------|-----------|-------------------------------------------------|
| P44-2        | AGTT GCGCGCC ATGCAT ACTAGT AGATCT CTCGAG AATTGCCCTTCGAAGGGAC | MCS       | construct sgRNA cassette, R                     |
| P39-4        | AGTT ctgcag TCTAGA GGATCC GTCGAC TGCTGGAATTGCCCTTGATC        |           | construct sgRNA 2 cassette, F                   |
| P45          | ATC ATGGACTATAAGGATCACGATGG                                  | 1/2 EcoRV | cas9 F                                          |
| P46          | AGTA GCGGCCGC TCACCCGCAACTTTCCTC                             | NotI      | cas9 R                                          |
| P47-2        | CATTTGGAGAGGACA ATGGGGATTGAACAAGATGG                         |           | G418, fusion with 35S                           |
| P48          | GATCGACAGATC TCAGAAGAACTCGTCAAGAAG                           |           | G418, fusion with polyA                         |
| P49          | G GATATC CAGATCCAGTG G                                       |           | PstI+EcoRV+BamHI, to delete Ubi-pro             |
| P50          | GATCCCACTGGATCTGGATATCCTGCA                                  |           | PstI+EcoRV+BamHI, to delete Ubi-pro             |
| P51-2        | CAGGAACTTGACATTA GTAAGTTTCTGCTTCTACC                         |           | insert Intron IV2 to cas9 HNH domain            |
| P52-2        | TAATCGCTCAACCGGT CTGCACATCAACAAATTTTG                        |           | insert Intron IV2 to cas9 HNH domain            |
| P53          | GAAACTTAC TAATGTCAAGTTCCTGATCG                               |           | amplify cas9 HNH domain MR                      |
| P54          | ATGTGCAG ACCGGTTGAGCGATTATGAC                                |           | amplify cas9 HNH domain MF                      |
| P55          | GACGTGAGGATCCACTGAGACTAGTATGCA                               | MCS       | Add MCS to binary vector for accepting sgRNA, F |
| P56          | TACTAGTCTCAGTGGATCCTCACGTCTGCA                               | MCS       | Add MCS to binary vector for accepting sgRNA, R |
| Adaptor F    | ATCCAGATCCAGTGG                                              |           | delete TagRFP in pHF215, F                      |
| Adaptor R    | GATCCCACTGGATCTGGAT                                          |           | delete TagRFP in pHF215, R                      |
| oriSeqF      | GATACCTACAGCGTGAGCATTGAG                                     |           | sequencing for ori , F                          |
| KanSeqR      | CGACTGAATCCGGTGAGAATG                                        |           | sequencing for kan, R                           |
| SeqbfKanR    | GTAAGCAGACAGTTTTATTGTTTCAT                                   |           | sequencing before kan,R                         |
| SeqbfUbiR    | GGTAATTTTTTATAACTTAGACATGC                                   |           | sequencing before Ubi,R                         |
| IPA1-sgRNA-F | tgttgAGAGCACAGCTCGAGTCGG                                     |           | CRISPR-IPA1 target, F                           |
| IPA1-sgRNA-R | aaacCCGACTCGAGCTGTGCTCTC                                     |           | CRISPR-IPA1 target, R                           |
| IPA1-CSPID-F | CCAAGGGTTCCAAGCAGCGTAA                                       |           | amplify CRISPR-IPA1 target region, F            |
| IPA1-CSPID-R | TGGGCATGATGGCTAGGACCAG                                       |           | amplify CRISPR-IPA1 target region, R            |

| <b>Primer name</b> | <b>Sequence</b>                      | <b>RE site</b> | <b>Featrues</b>            |
|--------------------|--------------------------------------|----------------|----------------------------|
| cLUC-F             | ATC ATGTCCGGTTATGTAAACAATCC          | 1/2 EcoRV      | Construct cLUC to pRTVnMyc |
| cLUC-R             | CACGGCGATCTTTCCGCCCTT                |                | Construct cLUC to pRTVnMyc |
| LUC-F              | actt GGATCC ATGGAAGACGCCAAAAACA      | BamHI          | Construct LUC to pRTVeVC   |
| LUC-MR             | GTTTACATAACCGGATCCATCCTTGTCATCAAGGC  |                | amplify LUC N terminal     |
| LUC-MF             | GATTGACAAGGATGGATCCGGTTATGTAAACAATCC |                | amplify LUC C terminal     |
| LUC-R              | actg AAGCTT CACGGCGATCTTTCCGCCCTT    | HindIII        | Construct LUC to pRTVeVC   |
